# Supplementary material
Source: PubMed Central journal article supplement (PMC7968786)
Supplement: 14-00851.pdf [file 14-00851.pdf]

**On-line Table: Differentially expressed genes in aneurysm tissue compared with those in control tissue**

| Gene      | Entrez Gene Name                                                       | Function                                                                                                          | Fold Change | P Value  | False Discovery Rate (q Value) | Direction of Expression |
|-----------|------------------------------------------------------------------------|-------------------------------------------------------------------------------------------------------------------|-------------|----------|--------------------------------|-------------------------|
| AADAC     | Arylacetamide deacetylase                                              | Positive regulation of triglyceride catabolic process                                                             | 4.46        | 1.33E-05 | 2.60E-04                       | Up-regulated            |
| ABCA6     | ATP-binding cassette, subfamily A (ABCI), member 6                     | Integral component of membrane                                                                                    | 3.79        | 9.15E-14 | 8.88E-12                       | Up-regulated            |
| ABCC3     | ATP-binding cassette, subfamily C (CFTR/MRP), member 3                 | ATPase activity, coupled to transmembrane movement of substances                                                  | 6.63        | 1.21E-10 | 7.33E-09                       | Up-regulated            |
| ABI3      | ABI family, member 3                                                   | Peptidyl-tyrosine phosphorylation                                                                                 | 6.47        | 2.47E-05 | 4.56E-04                       | Up-regulated            |
| ACKR1     | Atypical chemokine receptor 1 (Duffy blood group)                      | G-protein-coupled receptor signaling pathway                                                                      | 3.80        | 7.95E-10 | 4.18E-08                       | Up-regulated            |
| ACKR2     | Atypical chemokine receptor 2                                          | G-protein-coupled receptor signaling pathway                                                                      | 0.42        | 3.29E-04 | 4.41E-03                       | Down-regulated          |
| ACSM1     | Acyl-CoA synthetase medium-chain family member 1                       | Energy derivation by oxidation of organic compounds                                                               | 9.87        | 1.70E-08 | 6.52E-07                       | Up-regulated            |
| ACTC1     | Actin, $\alpha$ , cardiac muscle 1                                     | Negative regulation of apoptotic process                                                                          | 0.30        | 7.96E-06 | 1.65E-04                       | Down-regulated          |
| ACTG2     | Actin, $\gamma$ 2, smooth muscle, enteric                              | Blood microparticle                                                                                               | 0.29        | 1.61E-16 | 2.36E-14                       | Down-regulated          |
| ADAM33    | ADAM domain 33                                                         | Integral component of membrane                                                                                    | 0.23        | 9.74E-09 | 3.95E-07                       | Down-regulated          |
| ADAM8     | ADAM domain 8                                                          | Positive regulation of tumor necrosis factor (ligand) superfamily member 11 production                            | 4.69        | 2.93E-04 | 4.01E-03                       | Up-regulated            |
| ADAMTS18  | ADAM with thrombospondin type 1 motif 18                               | Negative regulation of platelet aggregation                                                                       | 6.27        | 4.37E-06 | 9.85E-05                       | Up-regulated            |
| ADAMTS20  | ADAM with thrombospondin type 1 motif 20                               | Positive regulation of melanocyte differentiation                                                                 | 0.18        | 1.50E-04 | 2.29E-03                       | Down-regulated          |
| ADAMTS3   | ADAM with thrombospondin type 1 motif 3                                | Positive regulation of vascular endothelial growth factor signaling pathway                                       | 3.14        | 1.67E-06 | 4.23E-05                       | Up-regulated            |
| ADAMTS6   | ADAM with thrombospondin type 1 motif 6                                | Proteinaceous extracellular matrix                                                                                | 0.48        | 1.25E-04 | 1.96E-03                       | Down-regulated          |
| ADAMTS8   | ADAM with thrombospondin type 1 motif 8                                | Low-affinity phosphate transmembrane transporter activity                                                         | 0.40        | 4.42E-07 | 1.31E-05                       | Down-regulated          |
| ADAMTSL1  | ADAMTS-like 1                                                          | Proteinaceous extracellular matrix                                                                                | 3.13        | 7.12E-09 | 3.01E-07                       | Up-regulated            |
| ADAP2     | ArfGAP with dual PH domains 2                                          | Phosphatidylinositol-3,4,5-trisphosphate binding                                                                  | 10.88       | 5.26E-14 | 5.21E-12                       | Up-regulated            |
| ADCYAP1R1 | Adenylate cyclase-activating polypeptide 1 (pituitary) receptor type 1 | Transmembrane receptor protein tyrosine kinase signaling pathway                                                  | 2.12        | 4.27E-05 | 7.45E-04                       | Up-regulated            |
| ADORA3    | Adenosine A3 receptor                                                  | Positive regulation of phosphatidylinositol 3-kinase signaling                                                    | 12.30       | 1.95E-07 | 6.14E-06                       | Up-regulated            |
| ADRA1A    | Adrenoceptor $\alpha$ 1A                                               | Negative regulation of heart rate involved in baroreceptor response to increased systemic arterial blood pressure | 0.39        | 1.79E-05 | 3.39E-04                       | Down-regulated          |
| AIFI      | Allograft inflammatory factor 1                                        | Positive regulation of G <sub>1</sub> /S transition of mitotic cell cycle                                         | 12.40       | 1.81E-22 | 6.08E-20                       | Up-regulated            |
| ALDH1A2   | Aldehyde dehydrogenase 1 family, member A2                             | 3-Chloroallyl aldehyde dehydrogenase activity                                                                     | 2.46        | 2.46E-10 | 1.42E-08                       | Up-regulated            |
| ALOX5     | Arachidonate 5-lipoxygenase                                            | Leukotriene production involved in inflammatory response                                                          | 5.22        | 7.56E-15 | 9.12E-13                       | Up-regulated            |
| AMOTL2    | Angiomotin-like 2                                                      | Identical protein binding                                                                                         | 2.63        | 1.14E-12 | 9.56E-11                       | Up-regulated            |
| AMPH      | Amphiphysin                                                            | Synaptic vesicle endocytosis                                                                                      | 0.45        | 3.64E-05 | 6.44E-04                       | Down-regulated          |
| ANGPT4    | Angiopoietin 4                                                         | Activation of transmembrane receptor protein tyrosine kinase activity                                             | 2.37        | 5.52E-05 | 9.32E-04                       | Up-regulated            |
| ANKRD1    | Ankyrin repeat domain 1 (cardiac muscle)                               | Positive regulation of DNA damage response, signal transduction by p53 class mediator                             | 206.36      | 1.13E-18 | 2.48E-16                       | Up-regulated            |
| ANO3      | Anoctamin 3                                                            | Intracellular calcium-activated chloride channel activity                                                         | 9.30        | 4.58E-07 | 1.35E-05                       | Up-regulated            |
| AOAH      | Acyloxyacyl hydrolase (neutrophil)                                     | Negative regulation of inflammatory response                                                                      | 12.42       | 7.97E-07 | 2.21E-05                       | Up-regulated            |
| APBA2     | Amyloid $\beta$ (A4) precursor protein-binding, family A, member 2     | In utero embryonic development                                                                                    | 3.77        | 4.55E-06 | 1.02E-04                       | Up-regulated            |
| APLNR     | Apelin receptor                                                        | G-protein-coupled receptor signaling pathway                                                                      | 3.53        | 1.40E-05 | 2.72E-04                       | Up-regulated            |
| APOBEC1   | Apolipoprotein B mRNA editing enzyme, catalytic polypeptide 1          | Negative regulation of methylation-dependent chromatin silencing                                                  | 8.02        | 4.81E-07 | 1.41E-05                       | Up-regulated            |
| ARG1      | Arginase 1                                                             | Cellular response to transforming growth factor $\beta$ stimulus                                                  | 12.10       | 1.70E-05 | 3.25E-04                       | Up-regulated            |
| ARHGAP18  | Rho GTPase-activating protein 18                                       | Regulation of small GTPase-mediated signal transduction                                                           | 2.79        | 5.98E-07 | 1.71E-05                       | Up-regulated            |
| ARHGAP30  | Rho GTPase-activating protein 30                                       | Regulation of small GTPase-mediated signal transduction                                                           | 6.44        | 8.32E-06 | 1.70E-04                       | Up-regulated            |
| ARHGDI3   | Rho GDP-dissociation inhibitor (GDI) $\beta$                           | Regulation of small GTPase-mediated signal transduction                                                           | 2.27        | 5.35E-04 | 6.67E-03                       | Up-regulated            |
| ARHGEF26  | Rho guanine nucleotide exchange factor (GEF) 26                        | $\rho$ -Guanyl-nucleotide exchange factor activity                                                                | 0.46        | 6.31E-06 | 1.37E-04                       | Down-regulated          |
| ARNTL2    | Aryl hydrocarbon receptor nuclear translocator-like 2                  | RNA polymerase II core promoter proximal region sequence-specific DNA-binding transcription factor activity       | 15.63       | 3.60E-21 | 1.09E-18                       | Up-regulated            |
| ASGRI     | Asialoglycoprotein receptor 1                                          | Cellular response to extracellular stimulus                                                                       | 16.83       | 3.43E-24 | 1.54E-21                       | Up-regulated            |

Continued on next page

**On-line Table: Continued**

| Gene            | Entrez Gene Name                                                             | Function                                                                                                                                                       | Fold Change | P Value  | False Discovery Rate (q Value) | Direction of Expression |
|-----------------|------------------------------------------------------------------------------|----------------------------------------------------------------------------------------------------------------------------------------------------------------|-------------|----------|--------------------------------|-------------------------|
| <i>ATF3</i>     | Activating transcription factor 3                                            | RNA polymerase II transcription regulatory region sequence-specific DNA-binding transcription factor activity involved in positive regulation of transcription | 0.43        | 1.06E-06 | 2.85E-05                       | Down-regulated          |
| <i>ATP10B</i>   | ATPase, class V, type 10B                                                    | Phospholipid-translocating ATPase activity                                                                                                                     | 0.12        | 5.81E-05 | 9.67E-04                       | Down-regulated          |
| <i>ATPIA2</i>   | ATPase, Na <sup>+</sup> /K <sup>+</sup> transporting, $\alpha$ 2 polypeptide | Regulation of respiratory gaseous exchange by neurologic system process                                                                                        | 0.46        | 3.44E-07 | 1.04E-05                       | Down-regulated          |
| <i>ATP2A3</i>   | ATPase, Ca <sup>++</sup> transporting, ubiquitous                            | Platelet-dense tubular network membrane                                                                                                                        | 0.37        | 1.07E-12 | 9.10E-11                       | Down-regulated          |
| <i>ATP6V0D2</i> | ATPase, H <sup>+</sup> transporting, lysosomal 38 kDa, V0 subunit d2         | Vacuolar proton-transporting V-type ATPase complex                                                                                                             | 6.09        | 4.10E-05 | 7.16E-04                       | Up-regulated            |
| <i>ATP8B4</i>   | ATPase, class I, type 8B, member 4                                           | Phospholipid-translocating ATPase activity                                                                                                                     | 6.21        | 8.22E-06 | 1.69E-04                       | Up-regulated            |
| <i>BAG3</i>     | BCL2-associated athanogene 3                                                 | Extrinsic apoptotic signaling pathway via death-domain receptors                                                                                               | 0.50        | 1.33E-06 | 3.49E-05                       | Down-regulated          |
| <i>BASP1</i>    | Brain-abundant, membrane-attached signal protein 1                           | Positive regulation of metanephric ureteric bud development                                                                                                    | 4.18        | 6.71E-08 | 2.36E-06                       | Up-regulated            |
| <i>BATF</i>     | Basic leucine zipper transcription factor, ATF-like                          | DNA damage response, signal transduction by p53 class mediator                                                                                                 | 11.20       | 1.40E-04 | 2.15E-03                       | Up-regulated            |
| <i>BCHE</i>     | Butyrylcholinesterase                                                        | Negative regulation of synaptic transmission                                                                                                                   | 0.23        | 2.09E-12 | 1.73E-10                       | Down-regulated          |
| <i>BHLHE22</i>  | Basic helix-loop-helix family, member e22                                    | Sequence-specific DNA binding RNA polymerase II transcription factor activity                                                                                  | 3.21        | 6.64E-04 | 7.97E-03                       | Up-regulated            |
| <i>BIN2</i>     | Bridging integrator 2                                                        | Phagocytosis, engulfment                                                                                                                                       | 6.63        | 4.30E-05 | 7.47E-04                       | Up-regulated            |
| <i>BIRC3</i>    | Baculoviral IAP repeat containing 3                                          | Regulation of nucleotide-binding oligomerization domain containing signaling pathway                                                                           | 2.18        | 7.96E-04 | 9.39E-03                       | Up-regulated            |
| <i>BLNK</i>     | B-cell linker                                                                | Transmembrane receptor protein tyrosine kinase signaling pathway                                                                                               | 14.87       | 3.80E-08 | 1.38E-06                       | Up-regulated            |
| <i>BMPRI3</i>   | Bone morphogenetic protein receptor, type IB                                 | Positive regulation of extrinsic apoptotic signaling pathway via death-domain receptors                                                                        | 3.03        | 7.27E-08 | 2.54E-06                       | Up-regulated            |
| <i>BMX</i>      | BMX nonreceptor tyrosine kinase                                              | Cellular component disassembly involved in execution phase of apoptosis                                                                                        | 0.46        | 2.41E-04 | 3.43E-03                       | Down-regulated          |
| <i>BNIP1</i>    | BCL2/adenovirus E1B 19 kDa interacting protein-like                          | Negative regulation of cell proliferation                                                                                                                      | 9.55        | 1.92E-06 | 4.75E-05                       | Up-regulated            |
| <i>BOC</i>      | BOC cell adhesion associated, oncogene regulated                             | Positive regulation of muscle cell differentiation                                                                                                             | 2.46        | 2.82E-10 | 1.61E-08                       | Up-regulated            |
| <i>BTK</i>      | Bruton agammaglobulinemia tyrosine kinase                                    | Positive regulation of NF- $\kappa$ B transcription factor activity                                                                                            | 7.30        | 9.06E-07 | 2.47E-05                       | Up-regulated            |
| <i>BVES</i>     | Blood vessel epicardial substance                                            | Substrate adhesion-dependent cell spreading                                                                                                                    | 0.34        | 1.20E-07 | 4.02E-06                       | Down-regulated          |
| <i>C11orf16</i> | Chromosome 11 open reading frame 16                                          | —                                                                                                                                                              | 7.33        | 2.48E-04 | 3.51E-03                       | Up-regulated            |
| <i>C1orf110</i> | Chromosome 1 open reading frame 110                                          | —                                                                                                                                                              | 2.35        | 1.16E-04 | 1.84E-03                       | Up-regulated            |
| <i>C1orf162</i> | Chromosome 1 open reading frame 162                                          | Integral component of membrane                                                                                                                                 | 60.67       | 2.05E-12 | 1.71E-10                       | Up-regulated            |
| <i>C1orf54</i>  | Chromosome 1 open reading frame 54                                           | Extracellular region                                                                                                                                           | 3.66        | 5.77E-08 | 2.04E-06                       | Up-regulated            |
| <i>CIQA</i>     | Complement component 1, q subcomponent, A chain                              | Complement activation, classic pathway                                                                                                                         | 4.20        | 1.24E-15 | 1.64E-13                       | Up-regulated            |
| <i>CIQB</i>     | Complement component 1, q subcomponent, B chain                              | Complement activation, classic pathway                                                                                                                         | 5.21        | 1.19E-11 | 8.50E-10                       | Up-regulated            |
| <i>CIQC</i>     | Complement component 1, q subcomponent, C chain                              | Negative regulation of granulocyte differentiation                                                                                                             | 5.26        | 3.69E-14 | 3.87E-12                       | Up-regulated            |
| <i>CIQTNF3</i>  | Clq and tumor necrosis factor-related protein 3                              | Negative regulation of monocyte chemotactic protein 1 production                                                                                               | 0.49        | 2.70E-06 | 6.41E-05                       | Down-regulated          |
| <i>CIQTNF9</i>  | Clq and tumor necrosis factor-related protein 9                              | Extracellular region                                                                                                                                           | 2.65        | 8.54E-04 | 9.97E-03                       | Up-regulated            |
| <i>C1RL</i>     | Complement component 1, r subcomponent-like                                  | Complement activation, classic pathway                                                                                                                         | 2.01        | 3.41E-06 | 7.88E-05                       | Up-regulated            |
| <i>C1S</i>      | Complement component 1, s subcomponent                                       | Complement activation, classic pathway                                                                                                                         | 2.01        | 3.39E-06 | 7.84E-05                       | Up-regulated            |
| <i>C2orf40</i>  | Chromosome 2 open reading frame 40                                           | Cyclin catabolic process                                                                                                                                       | 4.57        | 5.21E-09 | 2.29E-07                       | Up-regulated            |
| <i>C3AR1</i>    | Complement component 3a receptor 1                                           | Positive regulation vascular endothelial growth factor production                                                                                              | 7.28        | 3.84E-09 | 1.74E-07                       | Up-regulated            |
| <i>C8orf34</i>  | Chromosome 8 open reading frame 34                                           | —                                                                                                                                                              | 13.83       | 1.13E-09 | 5.81E-08                       | Up-regulated            |
| <i>CA3</i>      | Carbonic anhydrase III, muscle specific                                      | Small molecule metabolic process                                                                                                                               | 0.20        | 5.66E-05 | 9.52E-04                       | Down-regulated          |
| <i>CA9</i>      | Carbonic anhydrase IX                                                        | Regulation of transcription from RNA polymerase II promoter in response to hypoxia                                                                             | 0.15        | 1.63E-16 | 2.36E-14                       | Down-regulated          |
| <i>CABLES1</i>  | Cdk5 and Abl enzyme substrate 1                                              | Cyclin-dependent protein serine/threonine kinase regulator activity                                                                                            | 2.23        | 4.16E-04 | 5.38E-03                       | Up-regulated            |
| <i>CADM1</i>    | Cell adhesion molecule 1                                                     | Positive regulation of natural killer cell-mediated cytotoxicity                                                                                               | 2.26        | 2.76E-04 | 3.84E-03                       | Up-regulated            |
| <i>CADM3</i>    | Cell adhesion molecule 3                                                     | Protein homodimerization activity                                                                                                                              | 0.37        | 1.92E-09 | 9.28E-08                       | Down-regulated          |
| <i>CAPG</i>     | Capping protein (actin filament), gelsolin-like                              | Barbed-end actin filament capping                                                                                                                              | 2.17        | 9.52E-06 | 1.92E-04                       | Up-regulated            |

Continued on next page

**On-line Table: Continued**

| Gene            | Entrez Gene Name                                   | Function                                                                                                     | Fold Change | P Value  | False Discovery Rate (q Value) | Direction of Expression |
|-----------------|----------------------------------------------------|--------------------------------------------------------------------------------------------------------------|-------------|----------|--------------------------------|-------------------------|
| <i>CASP1</i>    | Caspase 1, apoptosis-related cysteine peptidase    | Nucleotide-binding domain, leucine-rich repeat containing receptor signaling pathway                         | 11.56       | 1.02E-05 | 2.05E-04                       | Up-regulated            |
| <i>CASP8</i>    | Caspase 8, apoptosis-related cysteine peptidase    | Positive regulation of protein insertion into mitochondrial membrane involved in apoptotic signaling pathway | 4.88        | 7.45E-05 | 1.22E-03                       | Up-regulated            |
| <i>CASQ2</i>    | Calsequestrin 2 (cardiac muscle)                   | Regulation of cardiac muscle contraction by regulation of the release of sequestered calcium ion             | 0.21        | 3.21E-15 | 3.93E-13                       | Down-regulated          |
| <i>CCBE1</i>    | Collagen and calcium binding EGF domains 1         | Positive regulation of vascular endothelial growth factor signaling pathway                                  | 4.05        | 6.12E-07 | 1.74E-05                       | Up-regulated            |
| <i>CCDC102B</i> | Coiled-coil domain containing 102B                 | —                                                                                                            | 3.75        | 2.20E-06 | 5.33E-05                       | Up-regulated            |
| <i>CCDC126</i>  | Coiled-coil domain containing 126                  | $\alpha$ -1,6-Mannosylglycoprotein 6- $\beta$ -N-acetylglucosaminyltransferase activity                      | 2.03        | 1.30E-04 | 2.03E-03                       | Up-regulated            |
| <i>CCL13</i>    | Chemokine (C-C motif) ligand 13                    | Cellular calcium ion homeostasis                                                                             | 8.67        | 6.98E-06 | 1.48E-04                       | Up-regulated            |
| <i>CCL14</i>    | Chemokine (C-C motif) ligand 14                    | Positive regulation of cell proliferation                                                                    | 2.43        | 1.30E-06 | 3.45E-05                       | Up-regulated            |
| <i>CCL19</i>    | Chemokine (C-C motif) ligand 19                    | Positive regulation of dendritic cell antigen processing and presentation                                    | 7.04        | 1.37E-05 | 2.67E-04                       | Up-regulated            |
| <i>CCL2</i>     | Chemokine (C-C motif) ligand 2                     | G-protein-coupled receptor signaling pathway, coupled to cyclic nucleotide second messenger                  | 5.38        | 1.58E-10 | 9.30E-09                       | Up-regulated            |
| <i>CCL21</i>    | Chemokine (C-C motif) ligand 21                    | Positive regulation of dendritic cell antigen processing and presentation                                    | 8.19        | 2.35E-50 | 7.39E-47                       | Up-regulated            |
| <i>CCR1</i>     | Chemokine (C-C motif) receptor 1                   | G-protein-coupled receptor signaling pathway, coupled to cyclic nucleotide second messenger                  | 32.11       | 8.32E-14 | 8.16E-12                       | Up-regulated            |
| <i>CCR2</i>     | Chemokine (C-C motif) receptor 2                   | Positive regulation of immune complex clearance by monocytes and macrophages                                 | 13.14       | 8.62E-07 | 2.36E-05                       | Up-regulated            |
| <i>CCR5</i>     | Chemokine (C-C motif) receptor 5 (gene/pseudogene) | Release of sequestered calcium ion into cytosol by sarcoplasmic reticulum                                    | 24.10       | 9.71E-12 | 7.09E-10                       | Up-regulated            |
| <i>CD14</i>     | CD14 molecule                                      | Positive regulation of tumor necrosis factor production                                                      | 9.22        | 1.39E-17 | 2.33E-15                       | Up-regulated            |
| <i>CD163</i>    | CD163 molecule                                     | Integral component of plasma membrane                                                                        | 2.73        | 2.43E-07 | 7.48E-06                       | Up-regulated            |
| <i>CD180</i>    | CD180 molecule                                     | Positive regulation of lipopolysaccharide-mediated signaling pathway                                         | 13.45       | 2.66E-11 | 1.80E-09                       | Up-regulated            |
| <i>CD1C</i>     | CD1c molecule                                      | T-cell activation involved in immune response                                                                | 7.40        | 3.69E-04 | 4.90E-03                       | Up-regulated            |
| <i>CD200</i>    | CD200 molecule                                     | Integral component of plasma membrane                                                                        | 2.30        | 2.80E-09 | 1.31E-07                       | Up-regulated            |
| <i>CD300LG</i>  | CD300 molecule-like family member g                | Extracellular vesicular exosome                                                                              | 2.82        | 3.48E-05 | 6.21E-04                       | Up-regulated            |
| <i>CD34</i>     | CD34 molecule                                      | Positive regulation of glial cell line-derived neurotrophic factor secretion                                 | 0.44        | 2.10E-08 | 7.96E-07                       | Down-regulated          |
| <i>CD48</i>     | CD48 molecule                                      | Anchored component of plasma membrane                                                                        | 8.55        | 3.47E-08 | 1.27E-06                       | Up-regulated            |
| <i>CD53</i>     | CD53 molecule                                      | Positive regulation of myoblast fusion                                                                       | 5.49        | 1.65E-06 | 4.20E-05                       | Up-regulated            |
| <i>CD68</i>     | CD68 molecule                                      | Cellular response to organic substance                                                                       | 4.46        | 8.29E-09 | 3.43E-07                       | Up-regulated            |
| <i>CD74</i>     | CD74 molecule, MHC class II invariant chain        | Negative regulation of intrinsic apoptotic signaling pathway in response to DNA damage by p53 class mediator | 39.56       | 7.67E-18 | 1.36E-15                       | Up-regulated            |
| <i>CD80</i>     | CD80 molecule                                      | Positive regulation of granulocyte-macrophage colony-stimulating factor biosynthetic process                 | 15.17       | 1.39E-16 | 2.07E-14                       | Up-regulated            |
| <i>CD83</i>     | CD83 molecule                                      | Positive regulation of CD4-positive, $\alpha$ - $\beta$ T-cell differentiation                               | 13.66       | 4.69E-09 | 2.08E-07                       | Up-regulated            |
| <i>CD84</i>     | CD84 molecule                                      | Integral component of plasma membrane                                                                        | 11.44       | 1.40E-14 | 1.59E-12                       | Up-regulated            |
| <i>CD86</i>     | CD86 molecule                                      | Positive regulation of interleukin-2 biosynthetic process                                                    | 12.86       | 8.56E-11 | 5.24E-09                       | Up-regulated            |
| <i>CD93</i>     | CD93 molecule                                      | Cytoplasmic membrane-bounded vesicle                                                                         | 2.67        | 2.17E-10 | 1.26E-08                       | Up-regulated            |
| <i>CDH11</i>    | Cadherin 11, type 2, OB-cadherin (osteoblast)      | Corticospinal tract morphogenesis                                                                            | 4.57        | 1.32E-27 | 8.90E-25                       | Up-regulated            |
| <i>CDH19</i>    | Cadherin 19, type 2                                | Integral component of membrane                                                                               | 0.36        | 1.73E-04 | 2.59E-03                       | Down-regulated          |
| <i>CDH2</i>     | Cadherin 2, type 1, N-cadherin (neuronal)          | Negative regulation of canonical Wnt signaling pathway                                                       | 6.97        | 4.46E-12 | 3.50E-10                       | Up-regulated            |
| <i>CDH20</i>    | Cadherin 20, type 2                                | Integral component of membrane                                                                               | 3.71        | 4.35E-05 | 7.51E-04                       | Up-regulated            |
| <i>CDH3</i>     | Cadherin 3, type 1, P-cadherin (placental)         | Positive regulation of insulin-like growth factor receptor signaling pathway                                 | 9.70        | 8.01E-05 | 1.30E-03                       | Up-regulated            |
| <i>CDH6</i>     | Cadherin 6, type 2, K-cadherin (fetal kidney)      | Cell-cell junction organization                                                                              | 3.83        | 3.09E-06 | 7.21E-05                       | Up-regulated            |

Continued on next page

**On-line Table: Continued**

| Gene    | Entrez Gene Name                                                                            | Function                                                                                                                                                     | Fold Change | P Value  | False Discovery Rate (q Value) | Direction of Expression |
|---------|---------------------------------------------------------------------------------------------|--------------------------------------------------------------------------------------------------------------------------------------------------------------|-------------|----------|--------------------------------|-------------------------|
| CDH8    | Cadherin 8, type 2                                                                          | Synaptic transmission, glutamatergic                                                                                                                         | 0.34        | 2.55E-04 | 3.59E-03                       | Down-regulated          |
| CDK15   | Cyclin-dependent kinase 15                                                                  | Cyclin-dependent protein serine/threonine kinase activity                                                                                                    | 0.36        | 6.08E-04 | 7.47E-03                       | Down-regulated          |
| CDKN1A  | Cyclin-dependent kinase inhibitor 1A (p21, Cip1)                                            | DNA-damage response, signal transduction by p53 class mediator resulting in cell-cycle arrest                                                                | 3.78        | 3.89E-14 | 4.02E-12                       | Up-regulated            |
| CDKN2A  | Cyclin-dependent kinase inhibitor 2A                                                        | Positive regulation of DNA-damage response, signal transduction by p53 class mediator                                                                        | 54.19       | 1.81E-20 | 4.88E-18                       | Up-regulated            |
| CDKN2B  | Cyclin-dependent kinase inhibitor 2B (p15, inhibits CDK4)                                   | Positive regulation of transforming growth factor $\beta$ receptor signaling pathway                                                                         | 4.87        | 5.35E-10 | 2.91E-08                       | Up-regulated            |
| CELSR2  | Cadherin, EGF LAG seven-pass G-type receptor 2                                              | Neural plate anterior/posterior regionalization                                                                                                              | 0.49        | 2.92E-04 | 4.01E-03                       | Down-regulated          |
| CFH     | Complement factor H                                                                         | Complement activation, alternative pathway                                                                                                                   | 6.34        | 2.41E-26 | 1.33E-23                       | Up-regulated            |
| CFP     | Complement factor properdin                                                                 | Complement activation, alternative pathway                                                                                                                   | 5.33        | 4.32E-06 | 9.76E-05                       | Up-regulated            |
| CH25H   | Cholesterol 25-hydroxylase                                                                  | Cholesterol 25-hydroxylase activity                                                                                                                          | 4.67        | 7.58E-11 | 4.73E-09                       | Up-regulated            |
| CHAC1   | ChaC, cation transport regulator homolog 1 ( <i>Escherichia coli</i> )                      | Intrinsic apoptotic signaling pathway in response to endoplasmic reticulum stress                                                                            | 4.45        | 3.16E-05 | 5.70E-04                       | Up-regulated            |
| CHI3L1  | Chitinase 3-like 1 (cartilage glycoprotein 39)                                              | Positive regulation of peptidyl-threonine phosphorylation                                                                                                    | 7.97        | 5.85E-13 | 5.10E-11                       | Up-regulated            |
| CHI3L2  | Chitinase 3-like 2                                                                          | Carbohydrate metabolic process                                                                                                                               | 55.72       | 1.47E-07 | 4.77E-06                       | Up-regulated            |
| CHIT1   | Chitinase 1 (chitotriosidase)                                                               | Polysaccharide catabolic process                                                                                                                             | 24.30       | 2.13E-11 | 1.47E-09                       | Up-regulated            |
| CHMP4C  | Charged multivesicular body protein 4C                                                      | Positive regulation of viral release from host cell                                                                                                          | 0.34        | 1.35E-04 | 2.09E-03                       | Down-regulated          |
| CHN2    | Chimerin 2                                                                                  | Regulation of small GTPase-mediated signal transduction                                                                                                      | 3.47        | 7.42E-05 | 1.22E-03                       | Up-regulated            |
| CHP2    | Calcineurin-like EF-hand protein 2                                                          | Positive regulation of transcription from RNA polymerase II promoter                                                                                         | 2.64        | 2.30E-05 | 4.29E-04                       | Up-regulated            |
| CHRD12  | Chordin-like 2                                                                              | Cartilage development                                                                                                                                        | 6.46        | 1.29E-05 | 2.54E-04                       | Up-regulated            |
| CLEC12A | C-type lectin domain family 12, member A                                                    | Integral component of membrane                                                                                                                               | 20.14       | 7.62E-10 | 4.05E-08                       | Up-regulated            |
| CLEC4A  | C-type lectin domain family 4, member A                                                     | Transmembrane signaling receptor activity                                                                                                                    | 8.82        | 1.34E-07 | 4.39E-06                       | Up-regulated            |
| CLEC4D  | C-type lectin domain family 4, member D                                                     | Integral component of membrane                                                                                                                               | 8.99        | 5.31E-08 | 1.89E-06                       | Up-regulated            |
| CLEC4E  | C-type lectin domain family 4, member E                                                     | Positive regulation of cytokine secretion                                                                                                                    | 21.53       | 5.81E-13 | 5.10E-11                       | Up-regulated            |
| CLEC7A  | C-type lectin domain family 7, member A                                                     | Cell surface pattern recognition receptor signaling pathway                                                                                                  | 13.53       | 1.16E-17 | 2.00E-15                       | Up-regulated            |
| CMTM1   | CKLF-like MARVEL transmembrane domain containing 1                                          | Integral component of membrane                                                                                                                               | 3.59        | 5.48E-04 | 6.82E-03                       | Up-regulated            |
| COL10A1 | Collagen, type X, $\alpha 1$                                                                | Proteinaceous extracellular matrix                                                                                                                           | 163.48      | 3.66E-26 | 1.91E-23                       | Up-regulated            |
| COL11A1 | Collagen, type XI, $\alpha 1$                                                               | Detection of mechanical stimulus involved in sensory perception of sound                                                                                     | 29.94       | 7.85E-45 | 1.48E-41                       | Up-regulated            |
| COL12A1 | Collagen, type XII, $\alpha 1$                                                              | Extracellular matrix structural constituent conferring tensile strength                                                                                      | 3.28        | 1.11E-16 | 1.68E-14                       | Up-regulated            |
| COL1A1  | Collagen, type I, $\alpha 1$                                                                | Cartilage development involved in endochondral bone morphogenesis                                                                                            | 2.09        | 1.04E-04 | 1.66E-03                       | Up-regulated            |
| COL1A2  | Collagen, type I, $\alpha 2$                                                                | Transforming growth factor $\beta$ receptor signaling pathway                                                                                                | 2.05        | 4.84E-05 | 8.26E-04                       | Up-regulated            |
| COL23A1 | Collagen, type XXIII, $\alpha 1$                                                            | Extracellular matrix organization                                                                                                                            | 8.57        | 1.65E-23 | 6.49E-21                       | Up-regulated            |
| COL25A1 | Collagen, type XXV, $\alpha 1$                                                              | Integral component of plasma membrane                                                                                                                        | 2.30        | 7.73E-04 | 9.15E-03                       | Up-regulated            |
| COL28A1 | Collagen, type XXVIII, $\alpha 1$                                                           | Negative regulation of endopeptidase activity                                                                                                                | 0.29        | 6.27E-06 | 1.36E-04                       | Down-regulated          |
| COL4A3  | Collagen, type IV, $\alpha 3$ (Goodpasture antigen)                                         | Activation of cysteine-type endopeptidase activity involved in apoptotic process                                                                             | 3.97        | 1.21E-11 | 8.56E-10                       | Up-regulated            |
| COL4A4  | Collagen, type IV, $\alpha 4$                                                               | Extracellular matrix structural constituent                                                                                                                  | 5.86        | 8.57E-15 | 1.01E-12                       | Up-regulated            |
| COL8A1  | Collagen, type VIII, $\alpha 1$                                                             | Positive regulation of cell-substrate adhesion                                                                                                               | 2.26        | 1.36E-07 | 4.45E-06                       | Up-regulated            |
| COLQ    | Collagen-like tail subunit (single strand of homotrimer) of asymmetric acetylcholinesterase | Acetylcholine catabolic process in synaptic cleft                                                                                                            | 3.56        | 1.09E-04 | 1.74E-03                       | Up-regulated            |
| CORO1A  | Coronin, actin-binding protein 1A                                                           | Homeostasis of number of cells within a tissue                                                                                                               | 10.29       | 4.18E-06 | 9.53E-05                       | Up-regulated            |
| CP      | Ceruloplasmin (ferroxidase)                                                                 | Extracellular vesicular exosome                                                                                                                              | 4.48        | 1.54E-24 | 7.24E-22                       | Up-regulated            |
| CREB5   | cAMP-responsive element-binding protein 5                                                   | RNA polymerase II core promoter proximal region sequence-specific DNA-binding transcription factor activity involved in positive regulation of transcription | 0.49        | 2.71E-04 | 3.78E-03                       | Down-regulated          |
| CRTAC1  | Cartilage acidic protein 1                                                                  | Proteinaceous extracellular matrix                                                                                                                           | 2.20        | 4.42E-05 | 7.60E-04                       | Up-regulated            |
| CSF1R   | Colony-stimulating factor 1 receptor                                                        | Cellular response to macrophage colony-stimulating factor stimulus                                                                                           | 5.68        | 9.51E-30 | 7.47E-27                       | Up-regulated            |

Continued on next page

**On-line Table: Continued**

| Gene           | Entrez Gene Name                                                                      | Function                                                                                                                                                     | Fold Change | P Value  | False Discovery Rate (q Value) | Direction of Expression |
|----------------|---------------------------------------------------------------------------------------|--------------------------------------------------------------------------------------------------------------------------------------------------------------|-------------|----------|--------------------------------|-------------------------|
| <i>CSF2RB</i>  | Colony-stimulating factor 2 receptor, $\beta$ , low affinity (granulocyte-macrophage) | Granulocyte-macrophage colony-stimulating factor receptor complex                                                                                            | 4.70        | 3.84E-07 | 1.15E-05                       | Up-regulated            |
| <i>CTBS</i>    | Chitinase, di-N-acetyl-                                                               | Oligosaccharide catabolic process                                                                                                                            | 2.10        | 2.31E-05 | 4.30E-04                       | Up-regulated            |
| <i>CTGF</i>    | Connective tissue growth factor                                                       | Positive regulation of cysteine-type endopeptidase activity involved in apoptotic process                                                                    | 4.44        | 2.47E-19 | 5.96E-17                       | Up-regulated            |
| <i>CTSB</i>    | Cathepsin B                                                                           | Proteolysis involved in cellular protein catabolic process                                                                                                   | 2.43        | 1.39E-08 | 5.40E-07                       | Up-regulated            |
| <i>CTSE</i>    | Cathepsin E                                                                           | Antigen processing and presentation of exogenous peptide antigen via MHC class II                                                                            | 3.77        | 6.26E-04 | 7.65E-03                       | Up-regulated            |
| <i>CTSK</i>    | Cathepsin K                                                                           | Proteolysis involved in cellular protein catabolic process                                                                                                   | 2.04        | 1.33E-06 | 3.49E-05                       | Up-regulated            |
| <i>CTSS</i>    | Cathepsin S                                                                           | Antigen processing and presentation of exogenous peptide antigen via MHC class I, TAP independent                                                            | 5.95        | 4.79E-21 | 1.41E-18                       | Up-regulated            |
| <i>CX3CR1</i>  | Chemokine (C-X3-C motif) receptor 1                                                   | Negative regulation of extrinsic apoptotic signaling pathway in absence of ligand                                                                            | 61.52       | 1.33E-23 | 5.45E-21                       | Up-regulated            |
| <i>CXCL16</i>  | Chemokine (C-X-C motif) ligand 16                                                     | Low-density lipoprotein receptor activity                                                                                                                    | 2.31        | 2.63E-06 | 6.27E-05                       | Up-regulated            |
| <i>CXCL6</i>   | Chemokine (C-X-C motif) ligand 6                                                      | Defense response to bacterium                                                                                                                                | 5.29        | 5.34E-06 | 1.18E-04                       | Up-regulated            |
| <i>CXCL8</i>   | Chemokine (C-X-C motif) ligand 8                                                      | Regulation of single-stranded viral RNA replication via double-stranded DNA intermediate                                                                     | 12.37       | 4.62E-07 | 1.36E-05                       | Up-regulated            |
| <i>CXCR4</i>   | Chemokine (C-X-C motif) receptor 4                                                    | Positive regulation of cytosolic calcium ion concentration                                                                                                   | 7.52        | 2.09E-04 | 3.03E-03                       | Up-regulated            |
| <i>CXorf21</i> | Chromosome X open reading frame 21                                                    | —                                                                                                                                                            | 9.42        | 1.23E-05 | 2.44E-04                       | Up-regulated            |
| <i>CXorf36</i> | Chromosome X open reading frame 36                                                    | Extracellular region                                                                                                                                         | 3.63        | 9.52E-06 | 1.92E-04                       | Up-regulated            |
| <i>CYBB</i>    | Cytochrome b-245, $\beta$ polypeptide                                                 | Antigen processing and presentation of exogenous peptide antigen via MHC class I, TAP dependent                                                              | 3.99        | 2.08E-10 | 1.21E-08                       | Up-regulated            |
| <i>CYP26A1</i> | Cytochrome P450, family 26, subfamily A, polypeptide 1                                | Negative regulation of retinoic acid receptor signaling pathway                                                                                              | 86.52       | 3.30E-14 | 3.50E-12                       | Up-regulated            |
| <i>CYR61</i>   | Cysteine-rich, angiogenic inducer 61                                                  | Positive regulation of cysteine-type endopeptidase activity involved in apoptotic process                                                                    | 3.18        | 3.15E-15 | 3.90E-13                       | Up-regulated            |
| <i>CYSLTR1</i> | Cysteinyl leukotriene receptor 1                                                      | Positive regulation of cytosolic calcium ion concentration                                                                                                   | 4.17        | 7.78E-04 | 9.19E-03                       | Up-regulated            |
| <i>DAAM2</i>   | Dishevelled-associated activator of morphogenesis 2                                   | Actin cytoskeleton organization                                                                                                                              | 2.47        | 1.38E-10 | 8.29E-09                       | Up-regulated            |
| <i>DAB2</i>    | Dab, mitogen-responsive phosphoprotein, homolog 2 ( <i>Drosophila</i> )               | Positive regulation of transforming growth factor $\beta$ receptor signaling pathway                                                                         | 2.44        | 3.78E-11 | 2.51E-09                       | Up-regulated            |
| <i>DAPK2</i>   | Death-associated protein kinase 2                                                     | Regulation of intrinsic apoptotic signaling pathway                                                                                                          | 3.41        | 3.45E-08 | 1.26E-06                       | Up-regulated            |
| <i>DAPL1</i>   | Death-associated protein-like 1                                                       | Cell differentiation                                                                                                                                         | 2.25        | 6.95E-04 | 8.32E-03                       | Up-regulated            |
| <i>DAPPI</i>   | Dual adaptor of phosphotyrosine and 3-phosphoinositides                               | Phosphatidylinositol-3,4,5-trisphosphate binding                                                                                                             | 9.11        | 7.08E-06 | 1.49E-04                       | Up-regulated            |
| <i>DCBLD2</i>  | Discoidin, CUB and LCCL domain containing 2                                           | Intracellular receptor signaling pathway                                                                                                                     | 0.44        | 1.24E-07 | 4.12E-06                       | Down-regulated          |
| <i>DCHS2</i>   | Dachsous cadherin-related 2                                                           | Integral component of membrane                                                                                                                               | 0.35        | 2.79E-04 | 3.86E-03                       | Down-regulated          |
| <i>DDAH1</i>   | Dimethylarginine dimethylaminohydrolase 1                                             | Positive regulation of nitric-oxide biosynthetic process                                                                                                     | 2.24        | 7.24E-05 | 1.19E-03                       | Up-regulated            |
| <i>DES</i>     | Desmin                                                                                | Structural constituent of cytoskeleton                                                                                                                       | 0.35        | 2.39E-12 | 1.96E-10                       | Down-regulated          |
| <i>DHRS7C</i>  | Dehydrogenase/reductase (SDR family) member 7C                                        | Regulation of release of sequestered calcium ion into cytosol by sarcoplasmic reticulum                                                                      | 8.28        | 1.43E-06 | 3.73E-05                       | Up-regulated            |
| <i>DKK3</i>    | Dickkopf Wnt signaling pathway inhibitor 3                                            | Negative regulation of aldosterone biosynthetic process                                                                                                      | 3.18        | 7.14E-12 | 5.42E-10                       | Up-regulated            |
| <i>DLG2</i>    | Discs, large homolog 2 ( <i>Drosophila</i> )                                          | Negative regulation of phosphatase activity                                                                                                                  | 0.14        | 3.48E-12 | 2.76E-10                       | Down-regulated          |
| <i>DLX1</i>    | Distal-less homeobox 1                                                                | Regulation of transcription from RNA polymerase II promoter involved in forebrain neuron fate commitment                                                     | 3.28        | 3.75E-05 | 6.61E-04                       | Up-regulated            |
| <i>DLX5</i>    | Distal-less homeobox 5                                                                | RNA polymerase II core promoter proximal region sequence-specific DNA-binding transcription factor activity involved in positive regulation of transcription | 19.90       | 3.84E-36 | 4.52E-33                       | Up-regulated            |
| <i>DLX6</i>    | Distal-less homeobox 6                                                                | Transcription regulatory region sequence-specific DNA binding                                                                                                | 30.78       | 1.10E-19 | 2.79E-17                       | Up-regulated            |
| <i>DNAH11</i>  | Dynein, axonemal, heavy-chain 11                                                      | Cilium or flagellum-dependent cell motility                                                                                                                  | 0.09        | 1.52E-18 | 3.25E-16                       | Down-regulated          |
| <i>DNAJB5</i>  | DnaJ (Hsp40) homolog, subfamily B, member 5                                           | Negative regulation of transcription from RNA polymerase II promoter                                                                                         | 0.50        | 2.12E-07 | 6.65E-06                       | Down-regulated          |
| <i>DNAJC6</i>  | DnaJ (Hsp40) homolog, subfamily C, member 6                                           | Post-Golgi vesicle-mediated transport                                                                                                                        | 2.13        | 2.33E-04 | 3.32E-03                       | Up-regulated            |
| <i>DNER</i>    | Delta/notch-like EGF repeat containing                                                | Transmembrane signaling receptor activity                                                                                                                    | 0.27        | 6.92E-09 | 2.94E-07                       | Down-regulated          |

Continued on next page



**On-line Table: Continued**

| Gene           | Entrez Gene Name                                                       | Function                                                                                                                                                       | Fold Change | P Value  | False Discovery Rate (q Value) | Direction of Expression |
|----------------|------------------------------------------------------------------------|----------------------------------------------------------------------------------------------------------------------------------------------------------------|-------------|----------|--------------------------------|-------------------------|
| <i>DOCK2</i>   | Dedicator of cytokinesis 2                                             | Myeloid dendritic cell activation involved in immune response                                                                                                  | 5.33        | 1.16E-04 | 1.84E-03                       | Up-regulated            |
| <i>DOK3</i>    | Docking protein 3                                                      | Ras protein signal transduction                                                                                                                                | 14.55       | 5.03E-10 | 2.76E-08                       | Up-regulated            |
| <i>DPYSL3</i>  | Dihydropyrimidinase-like 3                                             | Hydrolase activity, acting on carbon—nitrogen (but not peptide) bonds, in cyclic amides                                                                        | 2.14        | 3.65E-09 | 1.67E-07                       | Up-regulated            |
| <i>DUSP6</i>   | Dual-specificity phosphatase 6                                         | Regulation of fibroblast growth factor receptor signaling pathway                                                                                              | 2.61        | 1.27E-07 | 4.21E-06                       | Up-regulated            |
| <i>DYNIII</i>  | Dynein, cytoplasmic 1, intermediate-chain 1                            | Antigen processing and presentation of exogenous peptide antigen via MHC class II                                                                              | 3.31        | 2.60E-06 | 6.21E-05                       | Up-regulated            |
| <i>EGR1</i>    | Early growth response 1                                                | RNA polymerase II core promoter proximal region sequence-specific DNA-binding transcription factor activity involved in positive regulation of transcription   | 2.85        | 4.04E-11 | 2.66E-09                       | Up-regulated            |
| <i>EMCN</i>    | Endomucin                                                              | Integral component of membrane                                                                                                                                 | 4.16        | 1.44E-14 | 1.62E-12                       | Up-regulated            |
| <i>EMP1</i>    | Epithelial membrane protein 1                                          | Multicellular organismal development                                                                                                                           | 2.36        | 1.01E-08 | 4.06E-07                       | Up-regulated            |
| <i>ENPEP</i>   | Glutamyl aminopeptidase (aminopeptidase A)                             | Regulation of systemic arterial blood pressure by renin-angiotensin                                                                                            | 5.79        | 2.40E-18 | 4.75E-16                       | Up-regulated            |
| <i>ENPP2</i>   | Ectonucleotide pyrophosphatase/phosphodiesterase 2                     | Alkyl glycerophosphoethanolamine phosphodiesterase activity                                                                                                    | 4.18        | 1.29E-21 | 4.06E-19                       | Up-regulated            |
| <i>ENPP3</i>   | Ectonucleotide pyrophosphatase/phosphodiesterase 3                     | Phosphate-containing compound metabolic process                                                                                                                | 3.97        | 3.35E-06 | 7.76E-05                       | Up-regulated            |
| <i>EPHA5</i>   | Eph receptor A5                                                        | Regulation of insulin secretion involved in cellular response to glucose stimulus                                                                              | 0.36        | 1.20E-05 | 2.39E-04                       | Down-regulated          |
| <i>EPST11</i>  | Epithelial stromal interaction 1 (breast)                              | —                                                                                                                                                              | 3.79        | 6.98E-04 | 8.34E-03                       | Up-regulated            |
| <i>ESM1</i>    | Endothelial cell-specific molecule 1                                   | Positive regulation of hepatocyte growth factor receptor signaling pathway                                                                                     | 0.45        | 2.16E-05 | 4.06E-04                       | Down-regulated          |
| <i>ETV5</i>    | ETS variant 5                                                          | RNA polymerase II transcription regulatory region sequence-specific DNA-binding transcription factor activity involved in positive regulation of transcription | 2.05        | 1.78E-05 | 3.37E-04                       | Up-regulated            |
| <i>EVI2A</i>   | Ecotropic viral integration site 2A                                    | Transmembrane signaling receptor activity                                                                                                                      | 9.44        | 6.68E-12 | 5.11E-10                       | Up-regulated            |
| <i>EVI2B</i>   | Ecotropic viral integration site 2B                                    | Integral component of plasma membrane                                                                                                                          | 14.52       | 5.18E-06 | 1.15E-04                       | Up-regulated            |
| <i>EXOC3L1</i> | Exocyst complex component 3-like 1                                     | Peptide hormone secretion                                                                                                                                      | 5.87        | 1.50E-06 | 3.87E-05                       | Up-regulated            |
| <i>F5</i>      | Coagulation factor V (proaccelerin, labile factor)                     | Serine-type endopeptidase activity                                                                                                                             | 4.24        | 1.69E-09 | 8.31E-08                       | Up-regulated            |
| <i>FABP5</i>   | Fatty acid-binding protein 5 (psoriasis associated)                    | Phosphatidylcholine biosynthetic process                                                                                                                       | 2.66        | 1.65E-06 | 4.20E-05                       | Up-regulated            |
| <i>FAM13C</i>  | Family with sequence similarity 13, member C                           | —                                                                                                                                                              | 0.20        | 3.30E-14 | 3.50E-12                       | Down-regulated          |
| <i>FAM43A</i>  | Family with sequence similarity 43, member A                           | —                                                                                                                                                              | 2.07        | 6.27E-04 | 7.65E-03                       | Up-regulated            |
| <i>FAM46A</i>  | Family with sequence similarity 46, member A                           | Regulation of blood coagulation                                                                                                                                | 2.08        | 3.85E-08 | 1.40E-06                       | Up-regulated            |
| <i>FAM46B</i>  | Family with sequence similarity 46, member B                           | —                                                                                                                                                              | 0.45        | 5.78E-09 | 2.52E-07                       | Down-regulated          |
| <i>FAM83D</i>  | Family with sequence similarity 83, member D                           | Mitotic nuclear division                                                                                                                                       | 0.08        | 1.17E-17 | 2.00E-15                       | Down-regulated          |
| <i>FAR2</i>    | Fatty acyl CoA reductase 2                                             | Fatty-acyl-CoA reductase (alcohol-forming) activity                                                                                                            | 0.27        | 1.56E-04 | 2.36E-03                       | Down-regulated          |
| <i>FBLN7</i>   | Fibulin 7                                                              | Proteinaceous extracellular matrix                                                                                                                             | 5.86        | 5.88E-31 | 5.03E-28                       | Up-regulated            |
| <i>FBN2</i>    | Fibrillin 2                                                            | Positive regulation of osteoblast differentiation                                                                                                              | 6.43        | 1.52E-04 | 2.31E-03                       | Up-regulated            |
| <i>FCERIA</i>  | Fc fragment of IgE, high-affinity I, receptor for $\alpha$ polypeptide | Positive regulation of granulocyte-macrophage colony-stimulating factor biosynthetic process                                                                   | 5.57        | 2.26E-04 | 3.23E-03                       | Up-regulated            |
| <i>FCGR1B</i>  | Fc fragment of IgG, high affinity Ib, receptor (CD64)                  | Antigen processing and presentation of exogenous peptide antigen via MHC class I, TAP dependent                                                                | 11.13       | 1.06E-22 | 3.69E-20                       | Up-regulated            |
| <i>FCGR2A</i>  | Fc fragment of IgG, low affinity IIa, receptor (CD32)                  | Fc- $\gamma$ receptor signaling pathway involved in phagocytosis                                                                                               | 5.14        | 4.97E-20 | 1.30E-17                       | Up-regulated            |
| <i>FGD2</i>    | FYVE, RhoGEF and PH domain containing 2                                | Regulation of small GTPase-mediated signal transduction                                                                                                        | 18.24       | 1.95E-09 | 9.37E-08                       | Up-regulated            |
| <i>FGF1</i>    | Fibroblast growth factor 1 (acidic)                                    | Positive regulation of transcription from RNA polymerase II promoter                                                                                           | 5.08        | 7.70E-23 | 2.79E-20                       | Up-regulated            |
| <i>FGFR4</i>   | Fibroblast growth factor receptor 4                                    | Fibroblast growth factor-activated receptor activity                                                                                                           | 2.49        | 1.88E-05 | 3.55E-04                       | Up-regulated            |
| <i>FHL1</i>    | Four and a half LIM domains 1                                          | Regulation of potassium ion transmembrane transporter activity                                                                                                 | 0.44        | 2.13E-07 | 6.65E-06                       | Down-regulated          |
| <i>FHL2</i>    | Four and a half LIM domains 2                                          | Negative regulation of transcription from RNA polymerase II promoter                                                                                           | 4.23        | 3.18E-22 | 1.03E-19                       | Up-regulated            |
| <i>FHOD3</i>   | Formin homology 2 domain containing 3                                  | Negative regulation of actin filament polymerization                                                                                                           | 0.24        | 2.88E-16 | 4.11E-14                       | Down-regulated          |
| <i>FLNC</i>    | Filamin C, $\gamma$                                                    | Cytoskeletal protein binding                                                                                                                                   | 0.45        | 2.89E-07 | 8.78E-06                       | Down-regulated          |
| <i>FMNL3</i>   | Formin-like 3                                                          | GTPase-activating protein binding                                                                                                                              | 2.79        | 3.69E-11 | 2.47E-09                       | Up-regulated            |
| <i>FNI</i>     | Fibronectin 1                                                          | Endoplasmic reticulum—Golgi intermediate compartment                                                                                                           | 2.80        | 3.30E-09 | 1.53E-07                       | Up-regulated            |
| <i>FOLR2</i>   | Folate receptor 2 (fetal)                                              | Anchored component of external side of plasma membrane                                                                                                         | 4.44        | 2.72E-10 | 1.56E-08                       | Up-regulated            |

Continued on next page

**On-line Table: Continued**

| Gene           | Entrez Gene Name                                                                             | Function                                                                                                                           | Fold Change | P Value  | False Discovery Rate (q Value) | Direction of Expression |
|----------------|----------------------------------------------------------------------------------------------|------------------------------------------------------------------------------------------------------------------------------------|-------------|----------|--------------------------------|-------------------------|
| <i>FOS</i>     | FBJ murine osteosarcoma viral oncogene homolog                                               | Regulation of sequence-specific DNA-binding transcription factor activity                                                          | 2.66        | 2.11E-06 | 5.16E-05                       | Up-regulated            |
| <i>FST</i>     | Follistatin                                                                                  | Negative regulation of transcription from RNA polymerase II promoter                                                               | 5.23        | 2.54E-25 | 1.26E-22                       | Up-regulated            |
| <i>FYB</i>     | FYN-binding protein                                                                          | NLS-bearing protein import into nucleus                                                                                            | 7.84        | 5.02E-05 | 8.55E-04                       | Up-regulated            |
| <i>GADD45A</i> | Growth arrest and DNA-damage inducible, $\alpha$                                             | Regulation of cyclin-dependent protein serine/threonine kinase activity                                                            | 2.11        | 8.01E-08 | 2.75E-06                       | Up-regulated            |
| <i>GAREM</i>   | GRB2 associated, regulator of MAPK1                                                          | Cellular response to EGF stimulus                                                                                                  | 0.48        | 4.92E-04 | 6.18E-03                       | Down-regulated          |
| <i>GAS2L2</i>  | Growth arrest-specific 2-like 2                                                              | Negative regulation of microtubule depolymerization                                                                                | 0.22        | 1.46E-04 | 2.24E-03                       | Down-regulated          |
| <i>GCNT1</i>   | Glucosaminyl (N-acetyl) transferase 1, core 2                                                | $\beta$ -1,3-Galactosyl-O-glycosyl-glycoprotein $\beta$ -1,6-N-acetylglucosaminyltransferase activity                              | 4.46        | 6.44E-04 | 7.81E-03                       | Up-regulated            |
| <i>GDF6</i>    | Growth-differentiation factor 6                                                              | Positive regulation of pathway-restricted SMAD protein phosphorylation                                                             | 3.30        | 3.21E-04 | 4.34E-03                       | Up-regulated            |
| <i>GGH</i>     | $\gamma$ -Glutamyl hydrolase (conjugase, folic polyglutamate hydrolase)                      | $\gamma$ -Glutamyl-peptidase activity                                                                                              | 3.99        | 1.90E-06 | 4.73E-05                       | Up-regulated            |
| <i>GLB1</i>    | Galactosidase, $\beta$ 1                                                                     | Glycosaminoglycan catabolic process                                                                                                | 2.84        | 1.78E-13 | 1.66E-11                       | Up-regulated            |
| <i>GLDN</i>    | Gliomedin                                                                                    | Protein binding involved in heterotypic cell-cell adhesion                                                                         | 11.50       | 3.83E-18 | 7.07E-16                       | Up-regulated            |
| <i>GLP2R</i>   | Glucagon-like peptide 2 receptor                                                             | Adenylate cyclase-modulating G-protein-coupled receptor signaling pathway                                                          | 17.27       | 7.00E-11 | 4.39E-09                       | Up-regulated            |
| <i>GMFG</i>    | Glia maturation factor, $\gamma$                                                             | Negative regulation of protein kinase activity                                                                                     | 7.59        | 3.41E-05 | 6.13E-04                       | Up-regulated            |
| <i>GNAO1</i>   | Guanine nucleotide-binding protein (G protein), $\alpha$ -activating activity polypeptide O  | Adenylate cyclase-modulating G-protein-coupled receptor signaling pathway                                                          | 0.32        | 4.31E-09 | 1.92E-07                       | Down-regulated          |
| <i>GNG2</i>    | Guanine nucleotide-binding protein (G protein), $\gamma$ 2                                   | Adenylate cyclase-activating dopamine receptor signaling pathway                                                                   | 3.18        | 6.50E-05 | 1.08E-03                       | Up-regulated            |
| <i>GNGT2</i>   | Guanine nucleotide-binding protein (G protein), $\gamma$ -transducing activity polypeptide 2 | G-protein-coupled receptor signaling pathway                                                                                       | 4.22        | 4.35E-05 | 7.51E-04                       | Up-regulated            |
| <i>GNPMB</i>   | Glycoprotein (transmembrane) nmb                                                             | Negative regulation of cell proliferation                                                                                          | 4.26        | 4.65E-08 | 1.66E-06                       | Up-regulated            |
| <i>GPR183</i>  | G-protein-coupled receptor 183                                                               | Mature B-cell differentiation involved in immune response                                                                          | 9.42        | 9.95E-09 | 4.02E-07                       | Up-regulated            |
| <i>GPR34</i>   | G-protein-coupled receptor 34                                                                | G-protein-coupled receptor signaling pathway                                                                                       | 8.01        | 1.59E-18 | 3.34E-16                       | Up-regulated            |
| <i>GPR65</i>   | G-protein-coupled receptor 65                                                                | Positive regulation of cAMP biosynthetic process                                                                                   | 19.44       | 2.00E-06 | 4.94E-05                       | Up-regulated            |
| <i>GPR97</i>   | G-protein-coupled receptor 97                                                                | G-protein-coupled receptor activity                                                                                                | 7.16        | 6.86E-10 | 3.67E-08                       | Up-regulated            |
| <i>GREM1</i>   | Gremlin 1, DAN family BMP antagonist                                                         | Positive regulation of transcription from RNA polymerase II promoter involved in myocardial precursor cell differentiation         | 3.65        | 1.98E-15 | 2.49E-13                       | Up-regulated            |
| <i>GREM2</i>   | Gremlin 2, DAN family BMP antagonist                                                         | Cytokine-mediated signaling pathway                                                                                                | 3.39        | 5.02E-06 | 1.11E-04                       | Up-regulated            |
| <i>GRN</i>     | Granulin                                                                                     | Positive regulation of epithelial cell proliferation                                                                               | 2.10        | 1.02E-06 | 2.75E-05                       | Up-regulated            |
| <i>HAVCRI</i>  | Hepatitis A virus cellular receptor 1                                                        | Integral component of membrane                                                                                                     | 11.58       | 2.28E-08 | 8.58E-07                       | Up-regulated            |
| <i>HCK</i>     | Hematopoietic cell kinase                                                                    | Regulation of sequence-specific DNA-binding transcription factor activity                                                          | 26.15       | 2.11E-11 | 1.46E-09                       | Up-regulated            |
| <i>HCLS1</i>   | Hematopoietic cell-specific Lyn substrate 1                                                  | Negative regulation of transcription from RNA polymerase II promoter                                                               | 14.90       | 1.37E-09 | 6.83E-08                       | Up-regulated            |
| <i>HEXA</i>    | Hexosaminidase A ( $\alpha$ polypeptide)                                                     | Cell morphogenesis involved in neuron differentiation                                                                              | 2.30        | 6.41E-09 | 2.75E-07                       | Up-regulated            |
| <i>HHATL</i>   | Hedgehog acyltransferase-like                                                                | Negative regulation of N-terminal protein palmitoylation                                                                           | 0.29        | 4.69E-04 | 5.93E-03                       | Down-regulated          |
| <i>HHIP</i>    | Hedgehog-interacting protein                                                                 | Oxidoreductase activity, acting on the CH—OH group of donors, quinone or similar compound as acceptor                              | 0.28        | 2.91E-10 | 1.64E-08                       | Down-regulated          |
| <i>HK3</i>     | Hexokinase 3 (white cell)                                                                    | Glucose 6-phosphate metabolic process                                                                                              | 11.49       | 1.02E-05 | 2.05E-04                       | Up-regulated            |
| <i>HLA-A</i>   | MHC class I, A                                                                               | Antigen processing and presentation of endogenous peptide antigen via MHC class I via ER pathway, TAP independent                  | 2.71        | 6.59E-06 | 1.42E-04                       | Up-regulated            |
| <i>HLA-DMA</i> | MHC class II, DM $\alpha$                                                                    | Antigen processing and presentation of exogenous peptide antigen via MHC class II                                                  | 26.08       | 4.57E-14 | 4.63E-12                       | Up-regulated            |
| <i>HLA-DMB</i> | MHC class II, DM $\beta$                                                                     | Positive regulation of T-cell activation via T-cell receptor contact with antigen bound to MHC molecule on antigen-presenting cell | 26.50       | 3.74E-13 | 3.35E-11                       | Up-regulated            |

Continued on next page

**On-line Table: Continued**

| Gene                 | Entrez Gene Name                                                          | Function                                                                                       | Fold Change | P Value  | False Discovery Rate (q Value) | Direction of Expression |
|----------------------|---------------------------------------------------------------------------|------------------------------------------------------------------------------------------------|-------------|----------|--------------------------------|-------------------------|
| <i>HLA-DOB</i>       | MHC class II, DO $\beta$                                                  | Negative regulation of antigen processing and presentation of peptide antigen via MHC class II | 11.08       | 8.39E-07 | 2.31E-05                       | Up-regulated            |
| <i>HLA-DPA1</i>      | MHC class II, DP $\alpha$ 1                                               | Antigen processing and presentation of exogenous peptide antigen via MHC class II              | 10.98       | 8.71E-08 | 2.96E-06                       | Up-regulated            |
| <i>HLA-DPB1</i>      | MHC class II, DP $\beta$ 1                                                | Antigen processing and presentation of exogenous peptide antigen via MHC class II              | 8.04        | 1.97E-05 | 3.71E-04                       | Up-regulated            |
| <i>HLA-DQA1</i>      | MHC class II, DQ $\alpha$ 1                                               | Antigen processing and presentation of exogenous peptide antigen via MHC class II              | 46.24       | 1.33E-19 | 3.30E-17                       | Up-regulated            |
| <i>HLA-DQB2</i>      | MHC class II, DQ $\beta$ 2                                                | Antigen processing and presentation of exogenous peptide antigen via MHC class II              | 12.42       | 2.69E-12 | 2.17E-10                       | Up-regulated            |
| <i>HLA-DRA</i>       | MHC class II, DR $\alpha$                                                 | Antigen processing and presentation of peptide or polysaccharide antigen via MHC class II      | 41.87       | 2.42E-18 | 4.75E-16                       | Up-regulated            |
| <i>HLA-DRB1</i>      | MHC class II, DR $\beta$ 1                                                | Positive regulation of insulin secretion involved in cellular response to glucose stimulus     | 44.42       | 2.50E-18 | 4.80E-16                       | Up-regulated            |
| <i>HLA-DRB5</i>      | MHC class II, DR $\beta$ 5                                                | Positive regulation of insulin secretion involved in cellular response to glucose stimulus     | 14.96       | 1.13E-09 | 5.81E-08                       | Up-regulated            |
| <i>HMCN1</i>         | Hemicentin 1                                                              | Extracellular vesicular exosome                                                                | 0.48        | 4.28E-08 | 1.54E-06                       | Down-regulated          |
| <i>HMGCLL1</i>       | 3-Hydroxymethyl-3-methylglutaryl-CoA lyase-like 1                         | Hydroxymethylglutaryl-CoA lyase activity                                                       | 0.23        | 7.21E-06 | 1.51E-04                       | Down-regulated          |
| <i>HMOX1</i>         | Heme oxygenase (decycling) 1                                              | Regulation of transcription from RNA polymerase II promoter in response to oxidative stress    | 9.52        | 7.20E-12 | 5.43E-10                       | Up-regulated            |
| <i>HNMT</i>          | Histamine N-methyltransferase                                             | Histamine N-methyltransferase activity                                                         | 3.22        | 7.34E-09 | 3.09E-07                       | Up-regulated            |
| <i>HP</i>            | Haptoglobin                                                               | Negative regulation of hydrogen peroxide catabolic process                                     | 3.00        | 5.08E-14 | 5.09E-12                       | Up-regulated            |
| <i>HPGD</i>          | Hydroxyprostaglandin dehydrogenase 15 (NAD)                               | Transforming growth factor $\beta$ receptor signaling pathway                                  | 0.20        | 8.68E-12 | 6.44E-10                       | Down-regulated          |
| <i>HPSE</i>          | Heparanase                                                                | Positive regulation vascular endothelial growth factor production                              | 3.66        | 5.44E-05 | 9.20E-04                       | Up-regulated            |
| <i>HPSE2</i>         | Heparanase 2                                                              | Heparan sulfate proteoglycan binding                                                           | 0.38        | 3.26E-04 | 4.39E-03                       | Down-regulated          |
| <i>HRH1</i>          | Histamine receptor H1                                                     | Phospholipase C-activating G-protein-coupled receptor signaling pathway                        | 0.31        | 2.03E-09 | 9.72E-08                       | Down-regulated          |
| <i>HS3ST1</i>        | Heparan sulfate (glucosamine) 3-O-sulfotransferase 1                      | [heparan sulfate]-Glucosamine 3-sulfotransferase 1 activity                                    | 0.45        | 3.73E-04 | 4.92E-03                       | Down-regulated          |
| <i>HSPA1A/HSPA1B</i> | Heat shock 70-kDa protein 1A                                              | —                                                                                              | 0.44        | 1.16E-07 | 3.89E-06                       | Down-regulated          |
| <i>HSPA1A/HSPA1B</i> | Heat shock 70-kDa protein 1A                                              | —                                                                                              | 0.42        | 1.02E-05 | 2.05E-04                       | Down-regulated          |
| <i>HSPA1A/HSPA1B</i> | Heat shock 70kDa protein 1A                                               | —                                                                                              | 0.41        | 9.44E-10 | 4.91E-08                       | Down-regulated          |
| <i>HTRA1</i>         | HtrA serine peptidase 1                                                   | Negative regulation of transforming growth factor $\beta$ receptor signaling pathway           | 2.11        | 3.75E-07 | 1.13E-05                       | Up-regulated            |
| <i>IFIT3</i>         | Interferon-induced protein with tetratricopeptide repeats 3               | Negative regulation of cell proliferation                                                      | 2.82        | 2.41E-05 | 4.47E-04                       | Up-regulated            |
| <i>IGFALS</i>        | Insulin-like growth factor-binding protein, acid-labile subunit           | Cellular protein metabolic process                                                             | 5.93        | 9.25E-05 | 1.49E-03                       | Up-regulated            |
| <i>IGJ</i>           | IgJ polypeptide, linker protein for Ig $\alpha$ and Ig $\mu$ polypeptides | Positive regulation of protein oligomerization                                                 | 4.93        | 2.92E-04 | 4.01E-03                       | Up-regulated            |
| <i>IGSF3</i>         | Ig superfamily, member 3                                                  | Integral component of membrane                                                                 | 0.48        | 2.46E-07 | 7.53E-06                       | Down-regulated          |
| <i>IGSF6</i>         | Ig superfamily, member 6                                                  | Transmembrane signaling receptor activity                                                      | 12.07       | 3.04E-16 | 4.27E-14                       | Up-regulated            |
| <i>IL13RA2</i>       | Interleukin 13 receptor, $\alpha$ 2                                       | Cytokine-mediated signaling pathway                                                            | 4.28        | 8.25E-07 | 2.29E-05                       | Up-regulated            |
| <i>IL15</i>          | Interleukin 15                                                            | Positive regulation of tyrosine phosphorylation of Stat3 protein                               | 3.91        | 4.11E-04 | 5.33E-03                       | Up-regulated            |
| <i>IL1B</i>          | Interleukin 1 $\beta$                                                     | Positive regulation of vascular endothelial growth factor receptor signaling pathway           | 23.09       | 1.70E-08 | 6.52E-07                       | Up-regulated            |
| <i>IL1R1</i>         | Interleukin 1 receptor type 1                                             | Interleukin 1, type 1, activating receptor activity                                            | 2.09        | 1.77E-07 | 5.69E-06                       | Up-regulated            |
| <i>IL1RL2</i>        | Interleukin 1 receptor-like 2                                             | Interleukin-1, type 1, activating receptor activity                                            | 7.24        | 7.60E-08 | 2.64E-06                       | Up-regulated            |
| <i>IL1RN</i>         | Interleukin 1 receptor antagonist                                         | Negative regulation of interleukin 1-mediated signaling pathway                                | 24.95       | 1.40E-10 | 8.32E-09                       | Up-regulated            |
| <i>IL21R</i>         | Interleukin 21 receptor                                                   | Interleukin 21-mediated signaling pathway                                                      | 24.86       | 2.36E-06 | 5.69E-05                       | Up-regulated            |
| <i>IL3RA</i>         | Interleukin 3 receptor, $\alpha$ (low affinity)                           | Interleukin 3-mediated signaling pathway                                                       | 4.80        | 5.73E-04 | 7.09E-03                       | Up-regulated            |
| <i>IL7</i>           | Interleukin 7                                                             | Negative regulation of extrinsic apoptotic signaling pathway in absence of ligand              | 3.61        | 1.49E-04 | 2.27E-03                       | Up-regulated            |
| <i>INPP4A</i>        | Inositol polyphosphate-4-phosphatase, type I, 107 kDa                     | Phosphatidylinositol-3,4-bisphosphate 4-phosphatase activity                                   | 0.49        | 1.87E-07 | 5.96E-06                       | Down-regulated          |
| <i>IRF5</i>          | Interferon regulatory factor 5                                            | Positive regulation of transcription from RNA polymerase II promoter                           | 18.44       | 1.42E-15 | 1.81E-13                       | Up-regulated            |

Continued on next page



**On-line Table: Continued**

| Gene            | Entrez Gene Name                                                                    | Function                                                                                                                                                       | Fold Change | P Value  | False Discovery Rate (q Value) | Direction of Expression |
|-----------------|-------------------------------------------------------------------------------------|----------------------------------------------------------------------------------------------------------------------------------------------------------------|-------------|----------|--------------------------------|-------------------------|
| <i>IRG1</i>     | Immunoresponsive 1 homolog (mouse)                                                  | Positive regulation of reactive oxygen species metabolic process                                                                                               | 9.95        | 3.75E-05 | 6.61E-04                       | Up-regulated            |
| <i>IRGC</i>     | Immunity-related GTPase family, cinema                                              | Hydrolase activity, acting on acid anhydrides                                                                                                                  | 4.34        | 3.18E-04 | 4.31E-03                       | Up-regulated            |
| <i>IRX5</i>     | Iroquois homeobox 5                                                                 | Sequence-specific DNA-binding transcription factor activity                                                                                                    | 11.81       | 4.03E-09 | 1.82E-07                       | Up-regulated            |
| <i>IRX6</i>     | Iroquois homeobox 6                                                                 | Sequence-specific DNA-binding transcription factor activity                                                                                                    | 3.38        | 3.56E-04 | 4.74E-03                       | Up-regulated            |
| <i>ITGA10</i>   | Integrin, $\alpha$ 10                                                               | Integrin-mediated signaling pathway                                                                                                                            | 3.51        | 4.98E-19 | 1.14E-16                       | Up-regulated            |
| <i>ITGA2B</i>   | Integrin, $\alpha$ 2b (platelet glycoprotein IIb of IIb/IIIa complex, antigen CD41) | Positive regulation of leukocyte migration                                                                                                                     | 0.33        | 5.64E-06 | 1.24E-04                       | Down-regulated          |
| <i>ITGA3</i>    | Integrin, $\alpha$ 3 (antigen CD49C, $\alpha$ 3 subunit of VLA-3 receptor)          | Positive regulation of neuron projection development                                                                                                           | 2.67        | 8.05E-08 | 2.76E-06                       | Up-regulated            |
| <i>ITGA5</i>    | Integrin, $\alpha$ 5 (fibronectin receptor, $\alpha$ polypeptide)                   | Positive regulation of vascular endothelial growth factor receptor signaling pathway                                                                           | 0.43        | 1.59E-08 | 6.13E-07                       | Down-regulated          |
| <i>ITGBL1</i>   | Integrin, $\beta$ -like 1 (with EGF-like repeat domains)                            | Extracellular region                                                                                                                                           | 2.06        | 8.84E-06 | 1.80E-04                       | Up-regulated            |
| <i>ITIH3</i>    | Inter- $\alpha$ -trypsin inhibitor heavy-chain 3                                    | Negative regulation of endopeptidase activity                                                                                                                  | 5.61        | 4.99E-13 | 4.43E-11                       | Up-regulated            |
| <i>KANK4</i>    | KN motif and ankyrin repeat domains 4                                               | Cytoplasm                                                                                                                                                      | 7.44        | 2.67E-27 | 1.68E-24                       | Up-regulated            |
| <i>KCNAB1</i>   | Potassium voltage-gated channel, shaker-related subfamily, $\beta$ member 1         | Regulation of potassium ion transmembrane transporter activity                                                                                                 | 0.25        | 6.83E-19 | 1.53E-16                       | Down-regulated          |
| <i>KCNH1</i>    | Potassium voltage-gated channel, subfamily H (eag-related), member 1                | Delayed rectifier potassium channel activity                                                                                                                   | 0.24        | 9.79E-07 | 2.66E-05                       | Down-regulated          |
| <i>KCNK3</i>    | Potassium channel, subfamily K, member 3                                            | Negative regulation of cytosolic calcium ion concentration                                                                                                     | 0.45        | 3.43E-05 | 6.14E-04                       | Down-regulated          |
| <i>KCNQ4</i>    | Potassium voltage-gated channel, KQT-like subfamily, member 4                       | Delayed rectifier potassium channel activity                                                                                                                   | 0.41        | 1.81E-05 | 3.42E-04                       | Down-regulated          |
| <i>KCNQ5</i>    | Potassium voltage-gated channel, KQT-like subfamily, member 5                       | Delayed rectifier potassium channel activity                                                                                                                   | 2.08        | 2.17E-04 | 3.11E-03                       | Up-regulated            |
| <i>KCTD12</i>   | Potassium channel tetramerization domain containing 12                              | Extracellular vesicular exosome                                                                                                                                | 2.70        | 2.67E-09 | 1.26E-07                       | Up-regulated            |
| <i>KDR</i>      | Kinase insert domain receptor (a type III receptor tyrosine kinase)                 | Positive regulation of nitric-oxide synthase biosynthetic process                                                                                              | 3.25        | 1.18E-09 | 6.00E-08                       | Up-regulated            |
| <i>KIAA1598</i> | KIAA1598                                                                            | Kinase binding                                                                                                                                                 | 3.29        | 2.99E-05 | 5.44E-04                       | Up-regulated            |
| <i>KIF21B</i>   | Kinesin family member 21B                                                           | Microtubule motor activity                                                                                                                                     | 7.76        | 4.04E-05 | 7.07E-04                       | Up-regulated            |
| <i>KIF5C</i>    | Kinesin family member 5C                                                            | Microtubule motor activity                                                                                                                                     | 0.42        | 3.32E-06 | 7.73E-05                       | Down-regulated          |
| <i>KIRREL3</i>  | Kin of IRRE-like 3 ( <i>Drosophila</i> )                                            | Principal sensory nucleus of trigeminal nerve development                                                                                                      | 0.44        | 4.47E-04 | 5.71E-03                       | Down-regulated          |
| <i>KIT</i>      | v-kit Hardy-Zuckerman 4 feline sarcoma viral oncogene homolog                       | Positive regulation of sequence-specific DNA-binding transcription factor activity                                                                             | 2.85        | 1.77E-04 | 2.64E-03                       | Up-regulated            |
| <i>KLHL40</i>   | Kelch-like family member 40                                                         | Multicellular organismal development                                                                                                                           | 0.23        | 7.91E-06 | 1.64E-04                       | Down-regulated          |
| <i>KLHL6</i>    | Kelch-like family member 6                                                          | B-cell receptor signaling pathway                                                                                                                              | 7.70        | 1.66E-04 | 2.50E-03                       | Up-regulated            |
| <i>LAPTM5</i>   | Lysosomal protein transmembrane 5                                                   | Integral component of plasma membrane                                                                                                                          | 9.60        | 5.95E-13 | 5.15E-11                       | Up-regulated            |
| <i>LCP2</i>     | Lymphocyte cytosolic protein 2 (SH2 domain containing leukocyte protein of 76 kDa)  | Transmembrane receptor protein tyrosine kinase signaling pathway                                                                                               | 12.68       | 3.91E-06 | 8.93E-05                       | Up-regulated            |
| <i>LECT1</i>    | Leukocyte-cell-derived chemotaxin 1                                                 | Negative regulation of vascular endothelial growth factor receptor signaling pathway                                                                           | 0.31        | 1.87E-08 | 7.11E-07                       | Down-regulated          |
| <i>LEF1</i>     | Lymphoid-enhancer-binding factor 1                                                  | RNA polymerase II transcription regulatory region sequence-specific DNA-binding transcription factor activity involved in positive regulation of transcription | 11.03       | 2.13E-07 | 6.65E-06                       | Up-regulated            |
| <i>LGALS9B</i>  | Lectin, galactoside binding, soluble 9B                                             | Carbohydrate binding                                                                                                                                           | 79.40       | 3.66E-09 | 1.67E-07                       | Up-regulated            |
| <i>LGMN</i>     | Legumain                                                                            | Antigen processing and presentation of exogenous peptide antigen via MHC class II                                                                              | 2.22        | 4.14E-09 | 1.86E-07                       | Up-regulated            |
| <i>LIPA</i>     | Lipase A, lysosomal acid, cholesterol esterase                                      | Homeostasis of number of cells within a tissue                                                                                                                 | 2.63        | 1.61E-11 | 1.13E-09                       | Up-regulated            |
| <i>LMO2</i>     | LIM domain only 2 (rhombotin-like 1)                                                | RNA polymerase II transcription regulatory region sequence-specific DNA-binding transcription factor activity involved in positive regulation of transcription | 2.13        | 1.41E-05 | 2.74E-04                       | Up-regulated            |
| <i>LNPI</i>     | Leukemia NUP98 fusion partner 1                                                     | —                                                                                                                                                              | 0.24        | 3.75E-05 | 6.61E-04                       | Down-regulated          |
| <i>LPCAT2</i>   | Lysophosphatidylcholine acyltransferase 2                                           | 1-Alkylglycerophosphocholine O-acetyltransferase activity                                                                                                      | 6.26        | 1.02E-11 | 7.38E-10                       | Up-regulated            |
| <i>LPXN</i>     | Leupaxin                                                                            | Negative regulation of B-cell receptor signaling pathway                                                                                                       | 6.17        | 4.73E-05 | 8.10E-04                       | Up-regulated            |
| <i>LRRTM3</i>   | Leucine-rich repeat transmembrane neuronal 3                                        | Positive regulation of $\beta$ -amyloid formation                                                                                                              | 3.85        | 1.82E-04 | 2.68E-03                       | Up-regulated            |
| <i>LY86</i>     | Lymphocyte antigen 86                                                               | Positive regulation of lipopolysaccharide-mediated signaling pathway                                                                                           | 18.71       | 5.28E-09 | 2.31E-07                       | Up-regulated            |
| <i>LYN</i>      | v-yes-1 Yamaguchi sarcoma viral-related oncogene homolog                            | Positive regulation of Fc receptor-mediated stimulatory signaling pathway                                                                                      | 5.48        | 1.11E-13 | 1.06E-11                       | Up-regulated            |

Continued on next page

**On-line Table: Continued**

| Gene                                                    | Entrez Gene Name                                                                     | Function                                                                                                                                                     | Fold Change | P Value  | False Discovery Rate (q Value) | Direction of Expression |
|---------------------------------------------------------|--------------------------------------------------------------------------------------|--------------------------------------------------------------------------------------------------------------------------------------------------------------|-------------|----------|--------------------------------|-------------------------|
| <i>LYPD6</i>                                            | LY6/PLAUR domain-containing 6                                                        | Extracellular region                                                                                                                                         | 0.44        | 5.81E-06 | 1.27E-04                       | Down-regulated          |
| <i>LYZ</i>                                              | Lysozyme                                                                             | Cell wall macromolecule catabolic process                                                                                                                    | 10.44       | 1.16E-08 | 4.60E-07                       | Up-regulated            |
| <i>LZTS1</i>                                            | Leucine zipper, putative tumor suppressor 1                                          | Sequence-specific DNA-binding transcription factor activity                                                                                                  | 2.10        | 8.45E-04 | 9.88E-03                       | Up-regulated            |
| <i>MAL2</i>                                             | Mal, T-cell differentiation protein 2 (gene/pseudogene)                              | Extracellular vesicular exosome                                                                                                                              | 0.11        | 2.65E-08 | 9.91E-07                       | Down-regulated          |
| <i>MAN1C1</i>                                           | Mannosidase, $\alpha$ , class 1C, member 1                                           | Mannosyl-oligosaccharide 1,2- $\alpha$ -mannosidase activity                                                                                                 | 2.05        | 8.13E-06 | 1.67E-04                       | Up-regulated            |
| <i>MAP4K1</i>                                           | MAPK kinase kinase kinase 1                                                          | MAPK kinase kinase activity                                                                                                                                  | 6.25        | 4.73E-04 | 5.97E-03                       | Down-regulated          |
| <i>MAPK4</i>                                            | MAPK4                                                                                | Protein heterodimerization activity                                                                                                                          | 0.27        | 7.85E-17 | 1.21E-14                       | Up-regulated            |
| <i>MARCKS</i>                                           | Myristoylated alanine-rich protein kinase C substrate                                | Energy-reserve metabolic process                                                                                                                             | 2.15        | 4.29E-05 | 7.47E-04                       | Up-regulated            |
| <i>MARCO</i>                                            | Macrophage receptor with collagenous structure                                       | Signaling pattern-recognition receptor activity                                                                                                              | 45.60       | 4.33E-09 | 1.93E-07                       | Up-regulated            |
| <i>MATN3</i>                                            | Matrilin 3                                                                           | Extracellular matrix structural constituent                                                                                                                  | 35.90       | 2.59E-18 | 4.88E-16                       | Up-regulated            |
| <i>MB21D1</i>                                           | Mab-21 domain containing 1                                                           | Positive regulation of defense response to virus by host                                                                                                     | 7.26        | 2.92E-06 | 6.89E-05                       | Up-regulated            |
| <i>MCOLN2</i>                                           | Mucolipin 2                                                                          | Calcium ion transmembrane transport                                                                                                                          | 23.65       | 3.00E-08 | 1.11E-06                       | Up-regulated            |
| <i>ME3</i>                                              | Malic enzyme 3, NADP(+) dependent, mitochondrial                                     | Malate dehydrogenase (decarboxylating) (NADP <sup>+</sup> ) activity                                                                                         | 0.33        | 8.31E-11 | 5.12E-09                       | Down-regulated          |
| <i>MEGF10</i>                                           | Multiple EGF-like domains 10                                                         | Regulation of skeletal muscle tissue development                                                                                                             | 2.48        | 5.60E-04 | 6.96E-03                       | Up-regulated            |
| <i>MEIS2</i>                                            | Meis homeobox 2                                                                      | RNA polymerase II core promoter proximal region sequence-specific DNA-binding transcription factor activity involved in positive regulation of transcription | 0.36        | 5.94E-09 | 2.58E-07                       | Down-regulated          |
| <i>MFAP3 L</i>                                          | Microfibrillar-associated protein 3-like                                             | Integral component of membrane                                                                                                                               | 0.32        | 7.80E-10 | 4.13E-08                       | Down-regulated          |
| <i>MFAP5</i>                                            | Microfibrillar-associated protein 5                                                  | Extracellular matrix structural constituent                                                                                                                  | 0.37        | 1.35E-08 | 5.29E-07                       | Down-regulated          |
| <i>MF12</i>                                             | Antigen p97 (melanoma associated) identified by monoclonal antibodies 133.2 and 96.5 | Negative regulation of substrate adhesion-dependent cell spreading                                                                                           | 12.28       | 5.50E-10 | 2.98E-08                       | Up-regulated            |
| <i>MGP</i>                                              | Matrix Gla protein                                                                   | Extracellular matrix structural constituent                                                                                                                  | 4.74        | 1.80E-18 | 3.70E-16                       | Up-regulated            |
| <i>MILR1</i>                                            | Mast cell Ig-like receptor 1                                                         | Negative regulation of mast cell activation                                                                                                                  | 15.14       | 1.46E-07 | 4.75E-06                       | Up-regulated            |
| <i>miR-1</i> (and other miRNAs with seed GGAAUGU)       | —                                                                                    | —                                                                                                                                                            | 0.48        | 4.62E-05 | 1.01E-03                       | Down-regulated          |
| <i>miR-10a-5p</i> (and other miRNAs with seed ACCUGU)   | —                                                                                    | —                                                                                                                                                            | 2.66        | 8.83E-09 | 4.66E-07                       | Up-regulated            |
| <i>miR-10a-5p</i> (and other miRNAs with seed ACCUGU)   | —                                                                                    | —                                                                                                                                                            | 2.45        | 3.47E-07 | 1.47E-05                       | Up-regulated            |
| <i>miR-146a-5p</i> (and other miRNAs with seed GAGAACU) | —                                                                                    | —                                                                                                                                                            | 3.32        | 9.08E-11 | 6.39E-09                       | Up-regulated            |
| <i>miR-146a-5p</i> (and other miRNAs with seed GAGAACU) | —                                                                                    | —                                                                                                                                                            | 3.68        | 1.45E-06 | 4.38E-05                       | Up-regulated            |
| <i>miR-204-5p</i> (and other miRNAs with seed UCCUUU)   | —                                                                                    | —                                                                                                                                                            | 0.48        | 7.32E-06 | 1.93E-04                       | Down-regulated          |
| <i>miR-21-5p</i> (and other miRNAs with seed AGCUUUAU)  | —                                                                                    | —                                                                                                                                                            | 3.51        | 4.43E-11 | 4.67E-09                       | Up-regulated            |
| <i>miR-223-3p</i> (miRNAs with seed GUCAGUU)            | —                                                                                    | —                                                                                                                                                            | 3.95        | 6.79E-12 | 1.43E-09                       | Up-regulated            |
| <i>miR-34a-5p</i> (and other miRNAs with seed GGCAGUG)  | —                                                                                    | —                                                                                                                                                            | 3.79        | 1.28E-06 | 4.38E-05                       | Up-regulated            |
| <i>miR-34a-5p</i> (and other miRNAs with seed GGCAGUG)  | —                                                                                    | —                                                                                                                                                            | 2.34        | 1.15E-04 | 2.02E-03                       | Up-regulated            |
| <i>miR-9-5p</i> (and other miRNAs with seed CUUUGGU)    | —                                                                                    | —                                                                                                                                                            | 0.43        | 4.80E-05 | 1.01E-03                       | Down-regulated          |
| <i>MLANA</i>                                            | Melan-A                                                                              | Integral component of plasma membrane                                                                                                                        | 13.86       | 1.25E-09 | 6.32E-08                       | Up-regulated            |
| <i>MMP12</i>                                            | Matrix metalloproteinase 12 (macrophage elastase)                                    | Positive regulation of epithelial cell proliferation involved in wound healing                                                                               | 44.11       | 2.61E-17 | 4.23E-15                       | Up-regulated            |
| <i>MMRN1</i>                                            | Multimerin 1                                                                         | Platelet $\alpha$ granule lumen                                                                                                                              | 3.94        | 9.16E-09 | 3.77E-07                       | Up-regulated            |
| <i>MPEG1</i>                                            | Macrophage expressed 1                                                               | Integral component of membrane                                                                                                                               | 17.10       | 1.16E-14 | 1.35E-12                       | Up-regulated            |
| <i>MRC1</i>                                             | Mannose receptor, C type 1                                                           | Integral component of plasma membrane                                                                                                                        | 2.55        | 1.86E-09 | 9.02E-08                       | Up-regulated            |
| <i>MS4A4A</i>                                           | Membrane-spanning 4 domains, subfamily A, member 4A                                  | Integral component of membrane                                                                                                                               | 3.67        | 2.36E-08 | 8.86E-07                       | Up-regulated            |
| <i>MS4A6A</i>                                           | Membrane-spanning 4-domains, subfamily A, member 6A                                  | Integral component of membrane                                                                                                                               | 4.63        | 2.66E-11 | 1.80E-09                       | Up-regulated            |
| <i>MSR1</i>                                             | Macrophage scavenger receptor 1                                                      | Positive regulation of macrophage-derived foam cell differentiation                                                                                          | 28.78       | 1.13E-29 | 8.20E-27                       | Up-regulated            |

Continued on next page

**On-line Table: Continued**

| Gene          | Entrez Gene Name                                                     | Function                                                                                                                                                     | Fold Change | P Value  | False Discovery Rate (q Value) | Direction of Expression |
|---------------|----------------------------------------------------------------------|--------------------------------------------------------------------------------------------------------------------------------------------------------------|-------------|----------|--------------------------------|-------------------------|
| <i>MST4</i>   | Serine/threonine protein kinase MST4                                 | Cellular component disassembly involved in execution phase of apoptosis                                                                                      | 3.08        | 5.76E-04 | 7.12E-03                       | Up-regulated            |
| <i>MSX2</i>   | Msh homeobox 2                                                       | RNA polymerase II core promoter proximal region sequence-specific DNA-binding transcription factor activity                                                  | 2.38        | 1.93E-04 | 2.82E-03                       | Up-regulated            |
| <i>MT1E</i>   | Metallothionein 1E                                                   | Cellular response to cadmium ion                                                                                                                             | 2.46        | 2.78E-07 | 8.47E-06                       | Up-regulated            |
| <i>MT2A</i>   | Metallothionein 2A                                                   | Interferon $\gamma$ -mediated signaling pathway                                                                                                              | 2.71        | 7.68E-06 | 1.60E-04                       | Up-regulated            |
| <i>MYCT1</i>  | myc target 1                                                         | Nucleus                                                                                                                                                      | 2.29        | 8.37E-04 | 9.82E-03                       | Up-regulated            |
| <i>MYLK2</i>  | Myosin light-chain kinase 2                                          | Skeletal muscle satellite cell differentiation                                                                                                               | 0.23        | 2.21E-04 | 3.16E-03                       | Down-regulated          |
| <i>MYO10</i>  | Myosin X                                                             | Fc- $\gamma$ receptor signaling pathway involved in phagocytosis                                                                                             | 2.97        | 6.43E-10 | 3.46E-08                       | Up-regulated            |
| <i>MYO1B</i>  | Myosin IB                                                            | Phosphatidylinositol-3,4,5-trisphosphate binding                                                                                                             | 0.47        | 2.42E-05 | 4.49E-04                       | Down-regulated          |
| <i>MYO1G</i>  | Myosin IG                                                            | Extracellular vesicular exosome                                                                                                                              | 6.58        | 3.00E-05 | 5.44E-04                       | Up-regulated            |
| <i>MYO7A</i>  | Myosin VIIA                                                          | Auditory receptor cell stereocilium organization                                                                                                             | 4.25        | 4.63E-16 | 6.32E-14                       | Up-regulated            |
| <i>MYO7B</i>  | Myosin VIIB                                                          | Extracellular vesicular exosome                                                                                                                              | 0.44        | 6.49E-04 | 7.82E-03                       | Down-regulated          |
| <i>MYOCD</i>  | Myocardin                                                            | RNA polymerase II core promoter proximal region sequence-specific DNA-binding transcription factor activity involved in positive regulation of transcription | 0.45        | 2.34E-07 | 7.26E-06                       | Down-regulated          |
| <i>NAGLU</i>  | N-Acetylglucosaminidase, $\alpha$                                    | Cerebellar Purkinje cell layer development                                                                                                                   | 2.46        | 5.04E-10 | 2.76E-08                       | Up-regulated            |
| <i>NALCN</i>  | Sodium leak channel, nonselective                                    | Membrane depolarization during action potential                                                                                                              | 3.33        | 1.68E-06 | 4.23E-05                       | Up-regulated            |
| <i>NAV3</i>   | Neuron navigator 3                                                   | Nucleoside-triphosphatase activity                                                                                                                           | 4.76        | 1.31E-14 | 1.51E-12                       | Up-regulated            |
| <i>NCF4</i>   | Neutrophil cytosolic factor 4, 40 kDa                                | Antigen processing and presentation of exogenous peptide antigen via MHC class I, TAP dependent                                                              | 6.95        | 6.64E-06 | 1.43E-04                       | Up-regulated            |
| <i>NCKAP5</i> | NCK-associated protein 5                                             | Biologic process                                                                                                                                             | 3.65        | 1.43E-06 | 3.72E-05                       | Up-regulated            |
| <i>NHS</i>    | Nance-Horan syndrome (congenital cataracts and dental anomalies)     | Lens development in camera-type eye                                                                                                                          | 2.01        | 3.20E-04 | 4.34E-03                       | Up-regulated            |
| <i>NOD1</i>   | Nucleotide-binding oligomerization domain containing 1               | Positive regulation of cysteine-type endopeptidase activity involved in apoptotic process                                                                    | 2.03        | 1.37E-05 | 2.67E-04                       | Up-regulated            |
| <i>NOS3</i>   | Nitric-oxide synthase 3 (endothelial cell)                           | Negative regulation of extrinsic apoptotic signaling pathway via death-domain receptors                                                                      | 0.32        | 6.53E-11 | 4.13E-09                       | Down-regulated          |
| <i>NRG1</i>   | Neuregulin 1                                                         | Negative regulation of extrinsic apoptotic signaling pathway in absence of ligand                                                                            | 5.92        | 2.77E-09 | 1.30E-07                       | Up-regulated            |
| <i>NRROS</i>  | Negative regulator of reactive oxygen species                        | Endoplasmic reticulum membrane                                                                                                                               | 5.62        | 3.96E-05 | 6.94E-04                       | Up-regulated            |
| <i>NTN1</i>   | Netrin 1                                                             | Positive regulation of cell proliferation                                                                                                                    | 0.48        | 7.40E-05 | 1.22E-03                       | Down-regulated          |
| <i>NUAK1</i>  | NUAK family, SNFI-like kinase 1                                      | Regulation of myosin-light-chain-phosphatase activity                                                                                                        | 4.54        | 2.22E-14 | 2.46E-12                       | Up-regulated            |
| <i>NUAK2</i>  | NUAK family, SNFI-like kinase 2                                      | Negative regulation of apoptotic process                                                                                                                     | 4.28        | 1.31E-04 | 2.04E-03                       | Up-regulated            |
| <i>NYAP2</i>  | Neuronal tyrosine-phosphorylated phosphoinositide-3-kinase adaptor 2 | Phosphatidylinositol 3-kinase signaling                                                                                                                      | 12.62       | 1.44E-09 | 7.14E-08                       | Up-regulated            |
| <i>OAS2</i>   | 2'-5'-Oligoadenylate synthetase 2, 69/71 kDa                         | Nucleobase-containing compound metabolic process                                                                                                             | 5.79        | 2.86E-05 | 5.21E-04                       | Up-regulated            |
| <i>OLFM3</i>  | Olfactomedin 3                                                       | $\alpha$ -Amino-3-hydroxy-5-methyl-4-isoxazolepropionic acid selective glutamate receptor complex                                                            | 0.32        | 7.43E-09 | 3.11E-07                       | Down-regulated          |
| <i>OLRI</i>   | Oxidized low-density lipoprotein (lectin-like) receptor 1            | Low-density lipoprotein receptor activity                                                                                                                    | 91.52       | 6.29E-47 | 1.48E-43                       | Up-regulated            |
| <i>OMD</i>    | Osteomodulin                                                         | Keratan sulfate biosynthetic process                                                                                                                         | 6.50        | 9.11E-37 | 1.23E-33                       | Up-regulated            |
| <i>OSBP2</i>  | Oxysterol-binding protein 2                                          | Cholesterol binding                                                                                                                                          | 7.67        | 1.30E-15 | 1.71E-13                       | Up-regulated            |
| <i>P2RX1</i>  | Purinergic receptor P2X, ligand-gated ion channel 1                  | Activation of cysteine-type endopeptidase activity involved in apoptotic process                                                                             | 0.29        | 7.55E-17 | 1.18E-14                       | Down-regulated          |
| <i>P2RY12</i> | Purinergic receptor P2Y, G protein coupled 12                        | Adenylate cyclase-inhibiting G-protein-coupled receptor signaling pathway                                                                                    | 6.84        | 1.55E-10 | 9.19E-09                       | Up-regulated            |
| <i>P2RY14</i> | Purinergic receptor P2Y, G protein coupled 14                        | G-protein-coupled purinergic nucleotide receptor signaling pathway                                                                                           | 0.27        | 1.68E-06 | 4.23E-05                       | Down-regulated          |
| <i>P4HA3</i>  | Prolyl 4-hydroxylase, $\alpha$ polypeptide III                       | Oxidoreductase activity, acting on single donors with incorporation of molecular oxygen, incorporation of 2 atoms of oxygen                                  | 6.02        | 6.09E-12 | 4.70E-10                       | Up-regulated            |
| <i>PAK6</i>   | p21 protein (Cdc42/Rac)-activated kinase 6                           | Regulation of transcription, DNA templated                                                                                                                   | 0.40        | 1.32E-04 | 2.05E-03                       | Down-regulated          |
| <i>PALD1</i>  | Phosphatase domain containing, paladin 1                             | Protein binding                                                                                                                                              | 2.47        | 7.55E-06 | 1.57E-04                       | Up-regulated            |
| <i>PALMD</i>  | Palmelphin                                                           | Regulation of cell shape                                                                                                                                     | 3.73        | 2.51E-13 | 2.29E-11                       | Up-regulated            |

Continued on next page

**On-line Table: Continued**

| Gene    | Entrez Gene Name                                                                 | Function                                                                                                                           | Fold Change | P Value  | False Discovery Rate (q Value) | Direction of Expression |
|---------|----------------------------------------------------------------------------------|------------------------------------------------------------------------------------------------------------------------------------|-------------|----------|--------------------------------|-------------------------|
| PAMR1   | Peptidase domain containing associated with muscle regeneration 1                | Extracellular region                                                                                                               | 0.44        | 1.63E-05 | 3.11E-04                       | Down-regulated          |
| PCDH12  | Protocadherin 12                                                                 | Integral component of plasma membrane                                                                                              | 3.37        | 6.77E-07 | 1.92E-05                       | Up-regulated            |
| PCP4L1  | Purkinje cell protein 4-like 1                                                   | —                                                                                                                                  | 3.13        | 1.71E-05 | 3.26E-04                       | Up-regulated            |
| PCSK2   | Proprotein convertase subtilisin/kexin type 2                                    | Islet amyloid polypeptide processing                                                                                               | 0.34        | 4.41E-05 | 7.59E-04                       | Down-regulated          |
| PCSK6   | Proprotein convertase subtilisin/kexin type 6                                    | Zygotic determination of anterior/posterior axis, embryo                                                                           | 0.50        | 2.38E-05 | 4.44E-04                       | Down-regulated          |
| PDE1B   | Phosphodiesterase 1B, calmodulin-dependent                                       | Cellular response to granulocyte-macrophage colony-stimulating factor stimulus                                                     | 2.17        | 4.47E-04 | 5.71E-03                       | Up-regulated            |
| PDE1C   | Phosphodiesterase 1C, calmodulin-dependent 70 kDa                                | Calmodulin-dependent cyclic-nucleotide phosphodiesterase activity                                                                  | 0.18        | 9.60E-12 | 7.07E-10                       | Down-regulated          |
| PDE7B   | Phosphodiesterase 7B                                                             | 3',5'-cAMP phosphodiesterase activity                                                                                              | 3.75        | 1.76E-09 | 8.59E-08                       | Up-regulated            |
| PDGFB   | Platelet-derived growth factor $\beta$ polypeptide                               | Positive regulation of metanephric mesenchymal cell migration by platelet-derived growth factor receptor $\beta$ signaling pathway | 2.75        | 1.30E-05 | 2.55E-04                       | Up-regulated            |
| PDGFC   | Platelet-derived growth factor C                                                 | Activation of transmembrane receptor protein tyrosine kinase activity                                                              | 2.77        | 9.57E-09 | 3.90E-07                       | Up-regulated            |
| PDGFD   | Platelet-derived growth factor D                                                 | Platelet-derived growth factor receptor signaling pathway                                                                          | 2.19        | 7.91E-08 | 2.73E-06                       | Up-regulated            |
| PDGFRL  | Platelet-derived growth factor receptor-like                                     | Platelet-derived growth factor receptor- $\beta$ signaling pathway                                                                 | 2.15        | 1.48E-07 | 4.79E-06                       | Up-regulated            |
| PDZD2   | PDZ domain containing 2                                                          | Endoplasmic reticulum                                                                                                              | 0.45        | 1.75E-08 | 6.66E-07                       | Down-regulated          |
| PDZRN4  | PDZ domain containing ring finger 4                                              | Ubiquitin-protein transferase activity                                                                                             | 0.41        | 7.60E-08 | 2.64E-06                       | Down-regulated          |
| PGF     | Placental growth factor                                                          | Vascular endothelial growth factor receptor signaling pathway                                                                      | 2.34        | 3.73E-04 | 4.92E-03                       | Up-regulated            |
| PGM5    | Phosphoglucomutase 5                                                             | Dystrophin-associated glycoprotein complex                                                                                         | 0.32        | 4.53E-12 | 3.53E-10                       | Down-regulated          |
| PIEZO2  | Piezo-type mechanosensitive ion channel component 2                              | Detection of mechanical stimulus involved in sensory perception                                                                    | 3.44        | 1.26E-07 | 4.17E-06                       | Up-regulated            |
| PIK3CG  | Phosphatidylinositol-4,5-bisphosphate 3-kinase, catalytic subunit $\gamma$       | 1-Phosphatidylinositol-4-phosphate 3-kinase, class IB complex                                                                      | 4.90        | 1.56E-04 | 2.36E-03                       | Up-regulated            |
| PIK3R5  | Phosphoinositide-3-kinase, regulatory subunit 5                                  | 1-Phosphatidylinositol-4-phosphate 3-kinase, class IB complex                                                                      | 8.14        | 4.22E-06 | 9.59E-05                       | Up-regulated            |
| PILRB   | Paired Ig-like type 2 receptor $\beta$                                           | Activation of transmembrane receptor protein tyrosine kinase activity                                                              | 28.07       | 7.51E-16 | 1.01E-13                       | Up-regulated            |
| PITPNM3 | PITPNM family member 3                                                           | Phosphatidylinositol transporter activity                                                                                          | 3.91        | 1.62E-04 | 2.44E-03                       | Up-regulated            |
| PKDCC   | Protein kinase domain containing, cytoplasmic                                    | Negative regulation of Golgi to plasma membrane protein transport                                                                  | 2.04        | 3.14E-07 | 9.52E-06                       | Up-regulated            |
| PKIA    | Protein kinase (cAMP-dependent, catalytic) inhibitor $\alpha$                    | Negative regulation of transcription from RNA polymerase II promoter                                                               | 0.31        | 8.17E-04 | 9.61E-03                       | Down-regulated          |
| PKIB    | Protein kinase (cAMP-dependent, catalytic) inhibitor $\beta$                     | Negative regulation of protein serine/threonine kinase activity                                                                    | 7.12        | 1.08E-13 | 1.03E-11                       | Up-regulated            |
| PLA1A   | Phospholipase A1 member A                                                        | Phosphatidylcholine 1-acylhydrolase activity                                                                                       | 8.09        | 1.81E-13 | 1.67E-11                       | Up-regulated            |
| PLA2G7  | Phospholipase A2, group VII (platelet-activating factor acetylhydrolase, plasma) | 1-Alkyl-2-acetylglcerophosphocholine esterase activity                                                                             | 3.07        | 4.30E-14 | 4.40E-12                       | Up-regulated            |
| PLA2R1  | Phospholipase A2 receptor 1, 180 kDa                                             | Positive regulation of DNA-damage response, signal transduction by p53 class mediator                                              | 3.33        | 6.41E-17 | 1.02E-14                       | Up-regulated            |
| PLAC8   | Placenta-specific 8                                                              | Positive regulation of transcription from RNA polymerase II promoter                                                               | 17.30       | 6.09E-09 | 2.62E-07                       | Up-regulated            |
| PLBD2   | Phospholipase B domain containing 2                                              | Extracellular vesicular exosome                                                                                                    | 2.03        | 5.03E-06 | 1.11E-04                       | Up-regulated            |
| PLCB2   | Phospholipase C $\beta$ 2                                                        | Phosphatidylinositol phospholipase C activity                                                                                      | 3.12        | 6.99E-07 | 1.97E-05                       | Up-regulated            |
| PLCB4   | Phospholipase C $\beta$ 4                                                        | Phosphatidylinositol phospholipase C activity                                                                                      | 0.47        | 1.64E-06 | 4.20E-05                       | Down-regulated          |
| PLCL1   | Phospholipase C-like 1                                                           | Regulation of synaptic transmission, GABAergic                                                                                     | 0.30        | 3.36E-12 | 2.68E-10                       | Down-regulated          |
| PLCXD2  | Phosphatidylinositol-specific phospholipase C, X domain containing 2             | Phosphoric diester hydrolase activity                                                                                              | 0.20        | 7.24E-05 | 1.19E-03                       | Down-regulated          |
| PLEK    | Pleckstrin                                                                       | Negative regulation of G-protein-coupled receptor protein signaling pathway                                                        | 3.93        | 3.04E-06 | 7.11E-05                       | Up-regulated            |
| PLK2    | Polo-like kinase 2                                                               | Positive regulation of proteasomal ubiquitin-dependent protein catabolic process                                                   | 2.27        | 1.78E-04 | 2.64E-03                       | Up-regulated            |
| PLK3    | Polo-like kinase 3                                                               | Positive regulation of proteasomal ubiquitin-dependent protein catabolic process involved in cellular response to hypoxia          | 2.54        | 7.59E-04 | 9.02E-03                       | Up-regulated            |
| PLXDC1  | Plexin domain containing 1                                                       | Integral component of membrane                                                                                                     | 0.27        | 1.12E-07 | 3.78E-06                       | Down-regulated          |
| PLXNC1  | Plexin C1                                                                        | Integral component of membrane                                                                                                     | 3.61        | 1.79E-04 | 2.65E-03                       | Up-regulated            |
| PODXL   | Podocalyxin-like                                                                 | Positive regulation of cell-cell adhesion mediated by integrin                                                                     | 0.47        | 3.92E-04 | 5.13E-03                       | Down-regulated          |

Continued on next page

**On-line Table: Continued**

| Gene     | Entrez Gene Name                                                    | Function                                                                                                       | Fold Change | P Value  | False Discovery Rate (q Value) | Direction of Expression |
|----------|---------------------------------------------------------------------|----------------------------------------------------------------------------------------------------------------|-------------|----------|--------------------------------|-------------------------|
| PPAPDC1A | Phosphatidic acid phosphatase type 2 domain containing 1A           | Fc-γ receptor signaling pathway involved in phagocytosis                                                       | 7.26        | 2.89E-08 | 1.07E-06                       | Up-regulated            |
| PRCP     | Prolylcarboxypeptidase (angiotensinase C)                           | Serine-type carboxypeptidase activity                                                                          | 2.37        | 9.33E-06 | 1.89E-04                       | Up-regulated            |
| PRDM1    | PR domain containing 1, with ZNF domain                             | Negative regulation of lipopolysaccharide-mediated signaling pathway                                           | 13.93       | 2.46E-07 | 7.53E-06                       | Up-regulated            |
| PRKG2    | Protein kinase, cGMP dependent, type II                             | Regulation of nitric-oxide synthase activity                                                                   | 0.23        | 7.31E-04 | 8.69E-03                       | Down-regulated          |
| PRRI5    | Proline-rich 15                                                     | Multicellular organismal development                                                                           | 7.19        | 2.02E-06 | 4.98E-05                       | Up-regulated            |
| PRR5 L   | Proline-rich 5-like                                                 | Positive regulation of phosphatidylinositol 3-kinase signaling                                                 | 3.05        | 1.11E-05 | 2.21E-04                       | Up-regulated            |
| PRUNE2   | Prune homolog 2 ( <i>Drosophila</i> )                               | Pyrophosphatase activity                                                                                       | 0.46        | 2.05E-06 | 5.04E-05                       | Down-regulated          |
| PTAFR    | Platelet-activating factor receptor                                 | Lipopolysaccharide-mediated signaling pathway                                                                  | 11.09       | 7.66E-09 | 3.18E-07                       | Up-regulated            |
| PTGER4   | Prostaglandin E receptor 4 (subtype EP4)                            | Adenylate cyclase-modulating G-protein-coupled receptor signaling pathway                                      | 2.86        | 3.45E-08 | 1.26E-06                       | Up-regulated            |
| PTK2B    | Protein tyrosine kinase 2β                                          | Positive regulation of protein ubiquitination involved in ubiquitin-dependent protein catabolic process        | 3.11        | 3.70E-04 | 4.91E-03                       | Up-regulated            |
| PTPN18   | Protein tyrosine phosphatase, nonreceptor type 18 (brain derived)   | Non-membrane-spanning protein tyrosine phosphatase activity                                                    | 9.65        | 3.60E-06 | 8.28E-05                       | Up-regulated            |
| PTPN6    | Protein tyrosine phosphatase, nonreceptor type 6                    | Negative regulation of humoral immune response mediated by circulating Ig                                      | 7.66        | 2.27E-06 | 5.49E-05                       | Up-regulated            |
| PTPRC    | Protein tyrosine phosphatase, receptor type, C                      | Negative regulation of cell adhesion involved in substrate-bound cell migration                                | 5.21        | 2.14E-04 | 3.08E-03                       | Up-regulated            |
| PTPRO    | Protein tyrosine phosphatase, receptor type, O                      | Transmembrane receptor protein tyrosine phosphatase activity                                                   | 5.50        | 2.50E-06 | 6.01E-05                       | Up-regulated            |
| PTX3     | Pentraxin 3, long                                                   | Positive regulation of nitric-oxide biosynthetic process                                                       | 5.65        | 1.25E-06 | 3.32E-05                       | Up-regulated            |
| QPCT     | Glutamyl-peptide cyclotransferase                                   | Peptidyl-pyroglutamic acid biosynthetic process, using glutamyl-peptide cyclotransferase                       | 2.40        | 1.32E-06 | 3.48E-05                       | Up-regulated            |
| QSOX1    | Quiescins Q6 sulfhydryl oxidase 1                                   | Flavin-linked sulfhydryl oxidase activity                                                                      | 2.58        | 1.72E-11 | 1.20E-09                       | Up-regulated            |
| RARRES1  | Retinoic acid receptor responder (tazarotene induced) 1             | Negative regulation of cell proliferation                                                                      | 3.48        | 1.20E-20 | 3.32E-18                       | Up-regulated            |
| RASLI0B  | RAS-like, family 10, member B                                       | Regulation of systemic arterial blood pressure by atrial natriuretic peptide                                   | 0.25        | 1.29E-05 | 2.54E-04                       | Down-regulated          |
| RBM47    | RNA-binding motif protein 47                                        | Poly(A) RNA binding                                                                                            | 5.06        | 6.03E-06 | 1.32E-04                       | Up-regulated            |
| RBP1     | Retinol-binding protein 1, cellular                                 | Phototransduction, visible light                                                                               | 2.32        | 2.64E-05 | 4.85E-04                       | Up-regulated            |
| RBP4     | Retinol-binding protein 4, plasma                                   | Detection of light stimulus involved in visual perception                                                      | 0.50        | 2.94E-06 | 6.91E-05                       | Down-regulated          |
| RBPMS2   | RNA-binding protein with multiple splicing 2                        | Nucleic acid binding                                                                                           | 0.46        | 7.03E-06 | 1.48E-04                       | Down-regulated          |
| RELN     | Reelin                                                              | Positive regulation of α-amino-3-hydroxy-5-methyl-4-isoxazole propionate-selective glutamate receptor activity | 2.84        | 2.51E-06 | 6.01E-05                       | Up-regulated            |
| RFTNI    | Raftlin, lipid raft linker 1                                        | T-cell antigen processing and presentation                                                                     | 2.06        | 2.32E-04 | 3.31E-03                       | Up-regulated            |
| RGS1     | Regulator of G-protein signaling 1                                  | Adenylate cyclase-inhibiting G-protein-coupled receptor signaling pathway                                      | 14.98       | 8.82E-07 | 2.41E-05                       | Up-regulated            |
| RGS10    | Regulator of G-protein signaling 10                                 | Termination of G-protein-coupled receptor signaling pathway                                                    | 2.74        | 5.36E-05 | 9.09E-04                       | Up-regulated            |
| RHOBTB1  | Rho-related BTB domain containing 1                                 | Regulation of small GTPase-mediated signal transduction                                                        | 2.17        | 8.49E-07 | 2.33E-05                       | Up-regulated            |
| RNASE6   | Ribonuclease, RNase A family, k6                                    | Endoribonuclease activity, producing 3'-phosphomonoesters                                                      | 8.06        | 3.62E-09 | 1.66E-07                       | Up-regulated            |
| RNU1-1   | RNA, U1 small nuclear 1                                             | —                                                                                                              | 0.23        | 2.78E-11 | 1.87E-09                       | Down-regulated          |
| ROBO2    | Roundabout, axon guidance receptor, homolog 2 ( <i>Drosophila</i> ) | Negative regulation of negative chemotaxis                                                                     | 2.83        | 7.02E-05 | 1.16E-03                       | Up-regulated            |
| ROBO4    | Roundabout, axon guidance receptor, homolog 4 ( <i>Drosophila</i> ) | Negative regulation of cell migration                                                                          | 2.15        | 9.35E-06 | 1.89E-04                       | Up-regulated            |
| RPS6KA1  | Ribosomal protein S6 kinase, 90 kDa, polypeptide 1                  | Negative regulation of cysteine-type endopeptidase activity involved in apoptotic process                      | 5.19        | 6.71E-06 | 1.44E-04                       | Up-regulated            |
| RRAD     | Ras-related associated with diabetes                                | Small GTPase-mediated signal transduction                                                                      | 0.34        | 2.16E-04 | 3.11E-03                       | Down-regulated          |
| RSPO2    | R-spondin 2                                                         | Epithelial tube branching involved in lung morphogenesis                                                       | 20.75       | 3.97E-19 | 9.35E-17                       | Up-regulated            |
| RTP4     | Receptor (chemosensory) transporter protein 4                       | Detection of chemical stimulus involved in sensory perception of bitter taste                                  | 2.33        | 1.11E-05 | 2.21E-04                       | Up-regulated            |

Continued on next page

**On-line Table: Continued**

| Gene            | Entrez Gene Name                                                                              | Function                                                                                                                                                     | Fold Change | P Value  | False Discovery Rate (q Value) | Direction of Expression |
|-----------------|-----------------------------------------------------------------------------------------------|--------------------------------------------------------------------------------------------------------------------------------------------------------------|-------------|----------|--------------------------------|-------------------------|
| <i>RUNX2</i>    | Runt-related transcription factor 2                                                           | RNA polymerase II core promoter proximal region sequence-specific DNA-binding transcription factor activity involved in positive regulation of transcription | 8.63        | 9.23E-09 | 3.78E-07                       | Up-regulated            |
| <i>RUNX3</i>    | Runt-related transcription factor 3                                                           | Sequence-specific DNA-binding RNA polymerase II transcription factor activity                                                                                | 6.08        | 8.08E-04 | 9.51E-03                       | Up-regulated            |
| <i>S100A1</i>   | S100 calcium-binding protein A1                                                               | Negative regulation of transcription from RNA polymerase II promoter                                                                                         | 2.89        | 4.11E-04 | 5.33E-03                       | Up-regulated            |
| <i>S100A14</i>  | S100 calcium-binding protein A14                                                              | Positive regulation of granulocyte chemotaxis                                                                                                                | 0.09        | 6.28E-04 | 7.65E-03                       | Down-regulated          |
| <i>SALL1</i>    | Spalt-like transcription factor 1                                                             | Mesenchymal to epithelial transition involved in metanephros morphogenesis                                                                                   | 7.04        | 6.22E-06 | 1.35E-04                       | Up-regulated            |
| <i>SAMSNI</i>   | SAM domain, SH3 domain and nuclear localization signals 1                                     | Negative regulation of peptidyl-tyrosine phosphorylation                                                                                                     | 5.52        | 5.34E-04 | 6.66E-03                       | Up-regulated            |
| <i>SBSPPON</i>  | Somatomedin B and thrombospondin, type 1 domain containing                                    | Proteinaceous extracellular matrix                                                                                                                           | 0.34        | 3.31E-09 | 1.53E-07                       | Down-regulated          |
| <i>SCARA5</i>   | Scavenger receptor class A, member 5 (putative)                                               | Integral component of plasma membrane                                                                                                                        | 0.42        | 1.12E-07 | 3.78E-06                       | Down-regulated          |
| <i>SCIN</i>     | Scinderin                                                                                     | Positive regulation of megakaryocyte differentiation                                                                                                         | 5.43        | 5.38E-11 | 3.42E-09                       | Up-regulated            |
| <i>SCN7A</i>    | Sodium channel, voltage gated, type VII, $\alpha$ subunit                                     | Membrane depolarization during action potential                                                                                                              | 0.42        | 6.49E-04 | 7.82E-03                       | Down-regulated          |
| <i>SDC3</i>     | Syndecan 3                                                                                    | Glycosaminoglycan biosynthetic process                                                                                                                       | 2.96        | 3.13E-10 | 1.74E-08                       | Up-regulated            |
| <i>SDS</i>      | Serine dehydratase                                                                            | L-Threonine ammonia-lyase activity                                                                                                                           | 2.09        | 1.15E-04 | 1.82E-03                       | Up-regulated            |
| <i>SEL1L3</i>   | Sel-1 suppressor of lin-12-like 3 ( <i>Caenorhabditis elegans</i> )                           | Integral component of membrane                                                                                                                               | 2.65        | 2.54E-04 | 3.58E-03                       | Up-regulated            |
| <i>SELE</i>     | Selectin E                                                                                    | Leukocyte migration involved in inflammatory response                                                                                                        | 13.59       | 1.31E-09 | 6.56E-08                       | Up-regulated            |
| <i>SEMA3A</i>   | Sema domain, Ig domain, short basic domain, secreted, (semaphorin) 3A                         | Dichotomous subdivision of terminal units involved in salivary gland branching                                                                               | 4.90        | 7.74E-11 | 4.79E-09                       | Up-regulated            |
| <i>SEMA4A</i>   | Sema domain, Ig domain, transmembrane domain and short cytoplasmic domain, (semaphorin) 4A    | Regulation of endothelial cell migration                                                                                                                     | 5.12        | 1.84E-06 | 4.60E-05                       | Up-regulated            |
| <i>SERPINE2</i> | Serpin peptidase inhibitor, clade E (nexin, plasminogen activator inhibitor type 1), member 2 | Detection of mechanical stimulus involved in sensory perception                                                                                              | 10.25       | 3.17E-55 | 1.49E-51                       | Up-regulated            |
| <i>SESN2</i>    | Sestrin 2                                                                                     | Regulation of response to reactive oxygen species                                                                                                            | 3.25        | 2.05E-04 | 2.98E-03                       | Up-regulated            |
| <i>SFRP2</i>    | Secreted frizzled-related protein 2                                                           | Negative regulation of cysteine-type endopeptidase activity involved in apoptotic process                                                                    | 2.59        | 8.31E-10 | 4.35E-08                       | Up-regulated            |
| <i>SGCD</i>     | Sarcoglycan, delta (35-kDa dystrophin-associated glycoprotein)                                | Dystrophin-associated glycoprotein complex                                                                                                                   | 0.47        | 1.56E-06 | 4.02E-05                       | Down-regulated          |
| <i>SGK1</i>     | Serum/glucocorticoid-regulated kinase 1                                                       | Regulation of sequence-specific DNA-binding transcription factor activity                                                                                    | 2.72        | 4.99E-11 | 3.24E-09                       | Up-regulated            |
| <i>SH2D1B</i>   | SH2 domain containing 1B                                                                      | Positive regulation of natural killer cell-mediated immunity                                                                                                 | 6.25        | 2.26E-07 | 7.02E-06                       | Up-regulated            |
| <i>SHF</i>      | Src homology 2 domain containing F                                                            | Apoptotic process                                                                                                                                            | 2.62        | 4.19E-06 | 9.53E-05                       | Up-regulated            |
| <i>SHOX2</i>    | Short stature homeobox 2                                                                      | Negative regulation of transcription from RNA polymerase II promoter                                                                                         | 4.86        | 4.95E-06 | 1.10E-04                       | Up-regulated            |
| <i>SIGLEC15</i> | Sialic acid-binding Ig-like lectin 15                                                         | Cellular response to lipoprotein particle stimulus                                                                                                           | 16.81       | 3.12E-10 | 1.74E-08                       | Up-regulated            |
| <i>SIRPB2</i>   | Signal-regulatory protein $\beta$ 2                                                           | Integral component of membrane                                                                                                                               | 3.48        | 1.43E-04 | 2.19E-03                       | Up-regulated            |
| <i>SIX1</i>     | SIX homeobox 1                                                                                | Positive regulation of mesenchymal cell proliferation involved in ureter development                                                                         | 2.24        | 1.74E-04 | 2.60E-03                       | Up-regulated            |
| <i>SKAP2</i>    | Src kinase associated phosphoprotein 2                                                        | Positive regulation of signal transduction                                                                                                                   | 3.44        | 7.44E-07 | 2.08E-05                       | Up-regulated            |
| <i>SLA</i>      | Src-like adaptor                                                                              | Positive regulation of signal transduction                                                                                                                   | 7.77        | 3.76E-04 | 4.95E-03                       | Up-regulated            |
| <i>SLAMF8</i>   | SLAM family member 8                                                                          | Regulation of NAD(P)H oxidase activity                                                                                                                       | 11.28       | 3.22E-06 | 7.50E-05                       | Up-regulated            |
| <i>SLC15A2</i>  | Solute carrier family 15 (oligopeptide transporter), member 2                                 | High-affinity oligopeptide transporter activity                                                                                                              | 15.30       | 3.13E-14 | 3.38E-12                       | Up-regulated            |
| <i>SLC15A3</i>  | Solute carrier family 15 (oligopeptide transporter), member 3                                 | Integral component of membrane                                                                                                                               | 2.70        | 2.06E-09 | 9.81E-08                       | Up-regulated            |
| <i>SLC37A2</i>  | Solute carrier family 37 (glucose-6-phosphate transporter), member 2                          | Extracellular vesicular exosome                                                                                                                              | 7.88        | 5.12E-18 | 9.28E-16                       | Up-regulated            |
| <i>SLC39A8</i>  | Solute carrier family 39 (zinc transporter), member 8                                         | Metal ion transmembrane transporter activity                                                                                                                 | 2.31        | 3.56E-05 | 6.34E-04                       | Up-regulated            |
| <i>SLC40A1</i>  | Solute carrier family 40 (iron-regulated transporter), member 1                               | Multicellular organismal iron ion homeostasis                                                                                                                | 2.21        | 3.92E-07 | 1.17E-05                       | Up-regulated            |
| <i>SLC44A4</i>  | Solute carrier family 44, member 4                                                            | Glycerophospholipid biosynthetic process                                                                                                                     | 4.97        | 4.52E-04 | 5.75E-03                       | Up-regulated            |
| <i>SLC46A1</i>  | Solute carrier family 46 (folate transporter), member 1                                       | Water-soluble vitamin metabolic process                                                                                                                      | 2.68        | 4.29E-04 | 5.50E-03                       | Up-regulated            |
| <i>SLC6A1</i>   | Solute carrier family 6 (neurotransmitter transporter), member 1                              | Positive regulation of $\gamma$ -aminobutyric acid secretion                                                                                                 | 0.09        | 1.85E-07 | 5.94E-06                       | Down-regulated          |

Continued on next page



**On-line Table: Continued**

| Gene     | Entrez Gene Name                                                                   | Function                                                                                                                                       | Fold Change | P Value  | False Discovery Rate (q Value) | Direction of Expression |
|----------|------------------------------------------------------------------------------------|------------------------------------------------------------------------------------------------------------------------------------------------|-------------|----------|--------------------------------|-------------------------|
| SLC7A7   | Solute carrier family 7 (amino acid transporter light-chain, y+L system), member 7 | Amino acid transmembrane transporter activity                                                                                                  | 7.02        | 5.97E-09 | 2.58E-07                       | Up-regulated            |
| SLC9A9   | Solute carrier family 9, subfamily A (NHE9, cation proton antiporter 9), member 9  | Hydrogen ion transmembrane transport                                                                                                           | 3.30        | 4.40E-08 | 1.58E-06                       | Up-regulated            |
| SLCO2A1  | Solute carrier organic anion transporter family, member 2A1                        | Prostaglandin transmembrane transporter activity                                                                                               | 0.45        | 4.87E-06 | 1.09E-04                       | Down-regulated          |
| SLCO2B1  | Solute carrier organic anion transporter family, member 2B1                        | Sodium-independent organic anion transmembrane transporter activity                                                                            | 4.92        | 8.03E-12 | 6.00E-10                       | Up-regulated            |
| SLITRK5  | SLIT and NTRK-like family, member 5                                                | Cardiovascular system development                                                                                                              | 0.18        | 1.02E-05 | 2.05E-04                       | Down-regulated          |
| SMAD6    | SMAD family member 6                                                               | Transforming growth factor $\beta$ receptor, inhibitory cytoplasmic mediator activity                                                          | 2.03        | 1.01E-04 | 1.62E-03                       | Up-regulated            |
| SMAP2    | Small ArfGAP2                                                                      | Positive regulation of GTPase activity                                                                                                         | 2.07        | 1.55E-05 | 2.98E-04                       | Up-regulated            |
| SMTNL1   | Smoothelin-like 1                                                                  | Positive regulation of vasoconstriction                                                                                                        | 0.28        | 4.54E-11 | 2.97E-09                       | Down-regulated          |
| SNX10    | Sorting nexin 10                                                                   | Extrinsic component of endosome membrane                                                                                                       | 3.10        | 1.01E-08 | 4.05E-07                       | Up-regulated            |
| SPI00    | SPI00 nuclear antigen                                                              | DNA-damage response, signal transduction by p53 class mediator resulting in transcription of p21 class mediator                                | 3.13        | 1.21E-04 | 1.91E-03                       | Up-regulated            |
| SP7      | Sp7 transcription factor                                                           | Positive regulation of transcription from RNA polymerase II promoter                                                                           | 7.02        | 4.30E-06 | 9.73E-05                       | Up-regulated            |
| SPARC    | Secreted protein, acidic, cysteine rich (osteonectin)                              | Cellular response to growth factor stimulus                                                                                                    | 2.00        | 2.45E-05 | 4.54E-04                       | Up-regulated            |
| SPII     | Spleen focus forming virus (SFV) proviral integration oncogene                     | RNA polymerase II distal enhancer sequence-specific DNA-binding transcription factor activity involved in positive regulation of transcription | 8.91        | 2.68E-13 | 2.43E-11                       | Up-regulated            |
| SPINK8   | Serine peptidase inhibitor, Kazal type 8 (putative)                                | Negative regulation of endopeptidase activity                                                                                                  | 0.31        | 1.17E-07 | 3.93E-06                       | Down-regulated          |
| SPP1     | Secreted phosphoprotein 1                                                          | Negative regulation of collateral sprouting of intact axon in response to injury                                                               | 17.18       | 6.48E-43 | 1.02E-39                       | Up-regulated            |
| SPRY4    | Sprouty homolog 4 ( <i>Drosophila</i> )                                            | Negative regulation of MAPK activity                                                                                                           | 4.88        | 6.54E-09 | 2.79E-07                       | Up-regulated            |
| SSX2IP   | Synovial sarcoma, X breakpoint 2-interacting protein                               | Regulation of Rac protein signal transduction                                                                                                  | 0.48        | 1.50E-07 | 4.85E-06                       | Down-regulated          |
| ST3GALS5 | ST3 $\beta$ -galactoside $\alpha$ -2,3-sialyltransferase 5                         | Neolactotetraosylceramide $\alpha$ -2,3-sialyltransferase activity                                                                             | 2.90        | 3.51E-05 | 6.26E-04                       | Up-regulated            |
| ST8SIA4  | ST8 $\alpha$ -N-acetyl-neuraminide $\alpha$ -2,8-sialyltransferase 4               | $\alpha$ -N-Acetylneuraminase $\alpha$ -2,8-sialyltransferase activity                                                                         | 3.98        | 2.53E-04 | 3.58E-03                       | Up-regulated            |
| STAB1    | Stabilin 1                                                                         | Low-density lipoprotein receptor activity                                                                                                      | 4.75        | 4.48E-27 | 2.64E-24                       | Up-regulated            |
| STAG3    | Stromal antigen 3                                                                  | Chromosome, centromeric region                                                                                                                 | 8.44        | 1.91E-07 | 6.07E-06                       | Up-regulated            |
| STARD8   | StAR-related lipid transfer domain containing 8                                    | Regulation of small GTPase-mediated signal transduction                                                                                        | 2.54        | 1.62E-05 | 3.11E-04                       | Up-regulated            |
| STC1     | Stanniocalcin 1                                                                    | Cellular response to glucocorticoid stimulus                                                                                                   | 5.14        | 2.98E-06 | 7.00E-05                       | Up-regulated            |
| STC2     | Stanniocalcin 2                                                                    | Negative regulation of multicellular organism growth                                                                                           | 3.38        | 1.28E-08 | 5.03E-07                       | Up-regulated            |
| STEAP3   | STEAP family member 3, metalloreductase                                            | Positive regulation of apoptotic process                                                                                                       | 3.86        | 1.83E-04 | 2.69E-03                       | Up-regulated            |
| SUCNR1   | Succinate receptor 1                                                               | G-protein-coupled receptor signaling pathway                                                                                                   | 3.98        | 5.70E-05 | 9.57E-04                       | Up-regulated            |
| SUSD3    | Sushi domain containing 3                                                          | Integral component of membrane                                                                                                                 | 4.47        | 5.04E-04 | 6.32E-03                       | Up-regulated            |
| SVEP1    | Sushi, von Willebrand factor type A, EGF and pentraxin domain containing 1         | Extracellular region                                                                                                                           | 2.13        | 7.03E-07 | 1.98E-05                       | Up-regulated            |
| SYK      | Spleen tyrosine kinase                                                             | Positive regulation of granulocyte-macrophage colony-stimulating factor biosynthetic process                                                   | 10.92       | 1.77E-06 | 4.44E-05                       | Up-regulated            |
| SYTL2    | Synaptotagmin-like 2                                                               | Phosphatidylinositol-4,5-bisphosphate binding                                                                                                  | 2.38        | 2.20E-06 | 5.33E-05                       | Up-regulated            |
| TACC2    | Transforming, acidic coiled-coil containing protein 2                              | Regulation of microtubule-based process                                                                                                        | 0.45        | 4.85E-07 | 1.42E-05                       | Down-regulated          |
| TACR1    | Tachykinin receptor 1                                                              | Phospholipase C-activating G-protein-coupled receptor signaling pathway                                                                        | 0.04        | 7.60E-24 | 3.25E-21                       | Down-regulated          |
| TAGAP    | T-cell activation Rho-GTPase-activating protein                                    | Regulation of small GTPase-mediated signal transduction                                                                                        | 8.00        | 7.07E-06 | 1.49E-04                       | Up-regulated            |
| TBX15    | T-box 15                                                                           | Negative regulation of transcription from RNA polymerase II promoter                                                                           | 0.38        | 1.94E-07 | 6.13E-06                       | Down-regulated          |
| TES      | Testis-derived transcript (3 LIM domains)                                          | Negative regulation of cell proliferation                                                                                                      | 0.46        | 2.42E-07 | 7.46E-06                       | Down-regulated          |
| TFEC     | Transcription factor EC                                                            | Sequence-specific DNA-binding transcription factor activity                                                                                    | 6.13        | 1.74E-06 | 4.37E-05                       | Up-regulated            |
| THBS1    | Thrombospondin 1                                                                   | Negative regulation of antigen processing and presentation of peptide or polysaccharide antigen via MHC class II                               | 14.05       | 6.53E-32 | 6.15E-29                       | Up-regulated            |
| THBS4    | Thrombospondin 4                                                                   | Positive regulation of peptidyl-tyrosine phosphorylation                                                                                       | 8.33        | 6.50E-13 | 5.56E-11                       | Up-regulated            |
| THEMIS   | Thymocyte selection associated                                                     | T-cell receptor signaling pathway                                                                                                              | 0.23        | 2.04E-04 | 2.97E-03                       | Down-regulated          |

Continued on next page

**On-line Table: Continued**

| Gene             | Entrez Gene Name                                                                 | Function                                                                                             | Fold Change | P Value  | False Discovery Rate (q Value) | Direction of Expression |
|------------------|----------------------------------------------------------------------------------|------------------------------------------------------------------------------------------------------|-------------|----------|--------------------------------|-------------------------|
| <i>THSD4</i>     | Thrombospondin, type 1, domain containing 4                                      | Extracellular vesicular exosome                                                                      | 3.88        | 3.11E-14 | 3.38E-12                       | Up-regulated            |
| <i>TIFAB</i>     | TRAF-interacting protein with forkhead-associated domain, family member B        | —                                                                                                    | 72.91       | 2.45E-17 | 4.05E-15                       | Up-regulated            |
| <i>TIMP1</i>     | TIMP metalloproteinase inhibitor 1                                               | Negative regulation of membrane protein ectodomain proteolysis                                       | 2.57        | 5.08E-11 | 3.25E-09                       | Up-regulated            |
| <i>TJP2</i>      | Tight junction protein 2                                                         | Cellular component disassembly involved in execution phase of apoptosis                              | 2.04        | 3.12E-05 | 5.64E-04                       | Up-regulated            |
| <i>TLR1</i>      | Toll-like receptor 1                                                             | Positive regulation of tumor necrosis factor biosynthetic process                                    | 9.43        | 1.57E-08 | 6.10E-07                       | Up-regulated            |
| <i>TLR8</i>      | Toll-like receptor 8                                                             | Pathogen-associated molecular pattern-dependent induction by symbiont of host innate immune response | 7.67        | 1.39E-15 | 1.80E-13                       | Up-regulated            |
| <i>TM4SF18</i>   | Transmembrane 4 L 6 family member 18                                             | Integral component of membrane                                                                       | 2.53        | 7.55E-05 | 1.23E-03                       | Up-regulated            |
| <i>TMEM56</i>    | Transmembrane protein 56                                                         | Integral component of membrane                                                                       | 0.40        | 4.01E-08 | 1.45E-06                       | Down-regulated          |
| <i>TMEM98</i>    | Transmembrane protein 98                                                         | Integral component of membrane                                                                       | 4.18        | 4.21E-07 | 1.25E-05                       | Up-regulated            |
| <i>TMOD1</i>     | Tropomodulin 1                                                                   | Adult locomotory behavior                                                                            | 0.46        | 4.92E-06 | 1.10E-04                       | Down-regulated          |
| <i>TMTC2</i>     | Transmembrane and tetratricopeptide repeat containing 2                          | Integral component of membrane                                                                       | 3.00        | 1.16E-09 | 5.94E-08                       | Up-regulated            |
| <i>TNFAIP8L2</i> | Tumor necrosis factor, $\alpha$ -induced protein 8-like 2                        | Negative regulation of inflammatory response                                                         | 7.39        | 9.97E-07 | 2.70E-05                       | Up-regulated            |
| <i>TNFRSF11A</i> | Tumor necrosis factor receptor superfamily, member 11a, NF- $\kappa$ B activator | Positive regulation of fever generation by positive regulation of prostaglandin secretion            | 3.14        | 6.86E-06 | 1.46E-04                       | Up-regulated            |
| <i>TNFRSF21</i>  | Tumor necrosis factor receptor superfamily member 21                             | Negative regulation of interleukin 10 secretion                                                      | 2.47        | 6.48E-08 | 2.29E-06                       | Up-regulated            |
| <i>TNFSF10</i>   | Tumor necrosis factor (ligand) superfamily member 10                             | Positive regulation of cysteine-type endopeptidase activity involved in apoptotic process            | 4.06        | 1.14E-13 | 1.08E-11                       | Up-regulated            |
| <i>TNFSF13B</i>  | Tumor necrosis factor (ligand) superfamily member 13b                            | Positive regulation of germinal center formation                                                     | 9.22        | 8.41E-15 | 1.00E-12                       | Up-regulated            |
| <i>TNN</i>       | Tenascin N                                                                       | Proteinaceous extracellular matrix                                                                   | 2.85        | 2.28E-04 | 3.26E-03                       | Up-regulated            |
| <i>TNNC1</i>     | Troponin C type 1 (slow)                                                         | Ventricular cardiac muscle tissue morphogenesis                                                      | 0.27        | 2.63E-12 | 2.14E-10                       | Down-regulated          |
| <i>TNNT2</i>     | Troponin T type 2 (cardiac)                                                      | Ventricular cardiac muscle tissue morphogenesis                                                      | 0.23        | 6.64E-21 | 1.90E-18                       | Down-regulated          |
| <i>TNXA</i>      | Tenascin XA (pseudogene)                                                         | Biologic process                                                                                     | 0.43        | 3.63E-06 | 8.34E-05                       | Down-regulated          |
| <i>TPBG</i>      | Trophoblast glycoprotein                                                         | Integral component of plasma membrane                                                                | 0.30        | 2.12E-06 | 5.18E-05                       | Down-regulated          |
| <i>TPD52</i>     | Tumor protein D52                                                                | Protein heterodimerization activity                                                                  | 2.14        | 1.62E-05 | 3.11E-04                       | Up-regulated            |
| <i>TPD52L1</i>   | Tumor protein D52-like 1                                                         | Regulation of cysteine-type endopeptidase activity involved in apoptotic process                     | 0.37        | 1.37E-04 | 2.11E-03                       | Down-regulated          |
| <i>TPPI</i>      | Tripeptidyl peptidase I                                                          | Activation of signaling protein activity involved in unfolded protein response                       | 2.02        | 6.72E-06 | 1.44E-04                       | Up-regulated            |
| <i>TRABD2A</i>   | TraB domain containing 2A                                                        | Negative regulation of Wnt signaling pathway                                                         | 4.98        | 1.21E-06 | 3.22E-05                       | Up-regulated            |
| <i>TREM2</i>     | Triggering receptor expressed on myeloid cells 2                                 | Positive regulation of antigen processing and presentation of peptide antigen via MHC class II       | 43.80       | 1.10E-58 | 1.03E-54                       | Up-regulated            |
| <i>TRIB3</i>     | Tribbles pseudokinase 3                                                          | Intrinsic apoptotic signaling pathway in response to endoplasmic reticulum stress                    | 4.85        | 1.83E-04 | 2.69E-03                       | Up-regulated            |
| <i>TRIM63</i>    | Tripartite motif containing 63, E3 ubiquitin protein ligase                      | Response to electrical stimulus involved in regulation of muscle adaptation                          | 0.39        | 1.54E-05 | 2.98E-04                       | Down-regulated          |
| <i>TRPM1</i>     | Transient receptor potential cation channel, subfamily M, member 1               | G-protein-coupled glutamate receptor signaling pathway                                               | 6.94        | 3.18E-04 | 4.31E-03                       | Up-regulated            |
| <i>TRPM3</i>     | Transient receptor potential cation channel, subfamily M, member 3               | Calcium ion transmembrane transport                                                                  | 0.37        | 1.82E-04 | 2.68E-03                       | Down-regulated          |
| <i>TSPAN15</i>   | Tetraspanin 15                                                                   | Establishment of protein localization to plasma membrane                                             | 0.38        | 6.94E-07 | 1.96E-05                       | Down-regulated          |
| <i>TSPAN2</i>    | Tetraspanin 2                                                                    | Integral component of membrane                                                                       | 0.42        | 1.26E-08 | 4.98E-07                       | Down-regulated          |
| <i>TUSC3</i>     | Tumor suppressor candidate 3                                                     | Dolichyl-diphosphooligosaccharide-protein glycotransferase activity                                  | 0.49        | 3.63E-04 | 4.83E-03                       | Down-regulated          |
| <i>TYR</i>       | Tyrosinase                                                                       | Melanin biosynthetic process from tyrosine                                                           | 0.15        | 7.33E-06 | 1.53E-04                       | Down-regulated          |
| <i>UCP2</i>      | Uncoupling protein 2 (mitochondrial, proton carrier)                             | Negative regulation of insulin secretion involved in cellular response to glucose stimulus           | 3.80        | 1.33E-04 | 2.07E-03                       | Up-regulated            |
| <i>UGT3A2</i>    | UDP glycosyltransferase 3 family, polypeptide A2                                 | Glucuronosyltransferase activity                                                                     | 4.76        | 3.15E-04 | 4.28E-03                       | Up-regulated            |
| <i>UNC5B</i>     | Unc-5 homolog B ( <i>C elegans</i> )                                             | Negative regulation of extrinsic apoptotic signaling pathway in absence of ligand                    | 4.16        | 4.11E-23 | 1.55E-20                       | Up-regulated            |
| <i>VCAM1</i>     | Vascular cell adhesion molecule 1                                                | Cellular response to vascular endothelial growth factor stimulus                                     | 2.75        | 5.07E-11 | 3.25E-09                       | Up-regulated            |
| <i>VIM</i>       | Vimentin                                                                         | Cellular component disassembly involved in execution phase of apoptosis                              | 0.50        | 5.76E-05 | 9.61E-04                       | Down-regulated          |

Continued on next page

**On-line Table: Continued**

| Gene    | Entrez Gene Name                                    | Function                                                                              | Fold Change | P Value  | False Discovery Rate (q Value) | Direction of Expression |
|---------|-----------------------------------------------------|---------------------------------------------------------------------------------------|-------------|----------|--------------------------------|-------------------------|
| VNN1    | Vanin 1                                             | Negative regulation of oxidative stress-induced intrinsic apoptotic signaling pathway | 2.04        | 8.70E-05 | 1.41E-03                       | Up-regulated            |
| VSIG4   | V-set and Ig domain containing 4                    | Negative regulation of interleukin 2 production                                       | 8.55        | 3.52E-32 | 3.69E-29                       | Up-regulated            |
| VWF     | von Willebrand factor                               | Blood coagulation, intrinsic pathway                                                  | 3.23        | 3.99E-16 | 5.53E-14                       | Up-regulated            |
| WAS     | Wiskott-Aldrich syndrome                            | Positive regulation of Arp2/3 complex-mediated actin nucleation                       | 4.60        | 1.40E-04 | 2.15E-03                       | Up-regulated            |
| WIF1    | Wnt inhibitory factor 1                             | Positive regulation of fat cell differentiation                                       | 3.99        | 1.06E-11 | 7.65E-10                       | Up-regulated            |
| WNT2    | Wingless-type MMTV integration site family member 2 | Positive regulation of epithelial cell proliferation involved in lung morphogenesis   | 0.20        | 3.58E-07 | 1.08E-05                       | Down-regulated          |
| XIRP1   | Xin actin-binding repeat containing 1               | Negative regulation of cell proliferation                                             | 3.75        | 9.74E-11 | 5.92E-09                       | Up-regulated            |
| ZCCHC5  | Zinc finger, CCHC domain containing 5               | Nucleic acid binding                                                                  | 2.12        | 3.29E-04 | 4.41E-03                       | Up-regulated            |
| ZCWPW1  | Zinc finger, CW type with PWWP domain 1             | Zinc ion binding                                                                      | 7.02        | 1.37E-08 | 5.34E-07                       | Up-regulated            |
| ZDHHC14 | Zinc finger, DHHC-type containing 14                | Protein-cysteine S-palmitoyltransferase activity                                      | 2.65        | 1.27E-04 | 1.99E-03                       | Up-regulated            |
| ZDHHC23 | Zinc finger, DHHC-type containing 23                | Protein-cysteine S-palmitoyltransferase activity                                      | 0.28        | 7.28E-04 | 8.68E-03                       | Down-regulated          |
| ZNF608  | Zinc finger protein 608                             | Metal ion binding                                                                     | 3.00        | 1.15E-08 | 4.58E-07                       | Up-regulated            |

**Note:**—ABI indicates Abelson interactor; ADAM, a disintegrin and metalloproteinase; ADAMTS, a disintegrin and metalloproteinase with thrombospondin motifs; ATP, adenosine triphosphate; cAMP, cyclic adenosine monophosphate; CFTR, cystic fibrosis transmembrane conductance regulator; cGMP, cyclic guanosine monophosphate; CoA, coenzyme A; EGF, epidermal growth factor; ER, estrogen receptor; FBJ, Finkel-Biskis-Jinkins; IAP, inhibitor of apoptosis; Ig, immunoglobulin; MAPK, mitogen-activated protein kinase; MRP, multidrug resistance-associated protein; NAD, nicotinamide adenine dinucleotide; NADP, nicotinamide adenine dinucleotide phosphate; NAD(P)H, reduced nicotinamide adenine dinucleotide phosphate; NF- $\kappa$ B, nuclear factor  $\kappa$ B; PH, Pleckstrin homology; SAM, sterile alpha motif; SDR, short-chain dehydrogenase/reductase; STEAP, six transmembrane epithelial antigen of prostate; TAP, transporter associated with antigen presentation; UDP, uridine 5'-diphosphate.

<sup>a</sup> Genes were determined to be differentially expressed if the *P* value was  $<.05$ , the false discovery rate was  $<0.01$ , and the fold change was  $>2$  or  $<0.5$ .
